# Supplementary material for: Bandgaps of atomically precise graphene nanoribbons and Occam's razor
Source: Royal Society of Chemistry journal article supplement (doi:10.1039/d2cp00650b), 2022-01-01
Supplement: d2cp00650b1.pdf [file d2cp00650b1.pdf]

## Supplementary Information

### Bandgaps of Atomically Precise Graphene Nanoribbons and Occam's Razor

Aristides D. Zdetsis\*

Molecular Engineering Laboratory, Department of Physics, University of Patras, Patras 26500  
GR, Greece.

#### Table of Contents

|                                                                     |                    |
|---------------------------------------------------------------------|--------------------|
| <b>§S1) Supplementary information for the 5-AGNRs (or 2x AGNRs)</b> | <b>pp. S2</b>      |
| <b>§S2) Supplementary information for the 7-AGNRs (or 3x AGNRs)</b> | <b>pp. S3</b>      |
| <b>§S3) Supplementary information for the 9-AGNRs (or 4x AGNRs)</b> | <b>pp. S4-S5</b>   |
| <b>§S4) Cartesian Coordinates of key 2x or 5-AGNRs</b>              | <b>pp. S6-S40</b>  |
| <b>§S5) Cartesian Coordinates of key 3x or 7-AGNRs</b>              | <b>pp. S40-S56</b> |
| <b>§S6) Cartesian Coordinates of key 4x or 9-AGNRs</b>              | <b>pp. S57-S71</b> |
| <b>§S7) References</b>                                              | <b>pp. S72</b>     |

#S1) supplementary information for the 5-AGNRs (or 2x AGNRs)

Comparison of Normal and Edge Modified 5-AGNRs at the Critical Length Region.

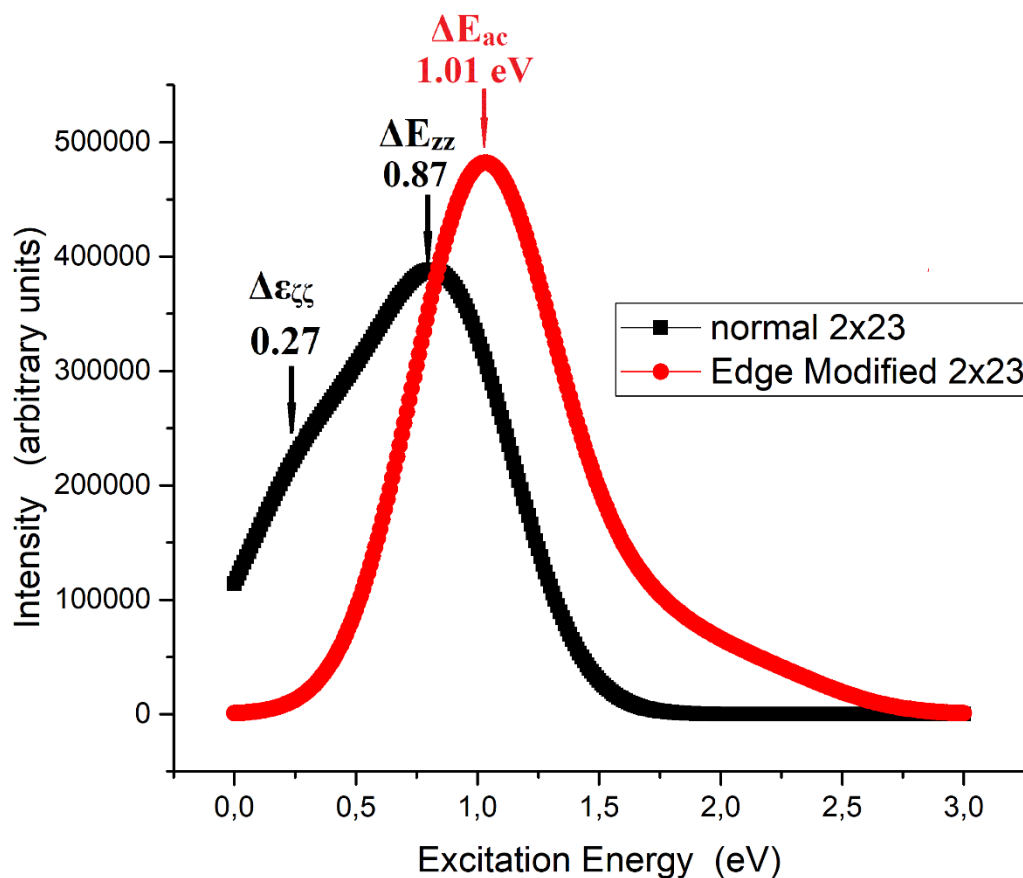

**FIGURE S1.** Spectrum of the 2x23 Normal and Edge Modified (in red) AGNRs, right after the end-states have appear at the critical length  $L_c \sim 100 \text{ \AA}$ .

These calculations have been performed with the Gaussian program package.<sup>1</sup>

As we can see in the figure the spectrum of the normal 5-AGNR is dominated by the surface states through the  $\Delta E_{zz}$  and  $\Delta\epsilon_{\zeta\zeta}$  peaks, involving “mixt” transitions between edge and “bulk” states, and between pure edge states, respectively. The “bulk”  $\Delta E_{ac}$  peak<sup>2</sup> is strongly suppressed in the normal 5x23 AGNR. In contrast, the spectrum of the corresponding edge modified AGNR, which have no zigzag ends and, therefore, no zigzag end states,<sup>3-4</sup> is fully determined by the  $\Delta E_{ac}$  peak.

## #S2) 7-AGNRs (or 3x AGNRs)

### Comparison of the spectra of 3x or 7-AGNR

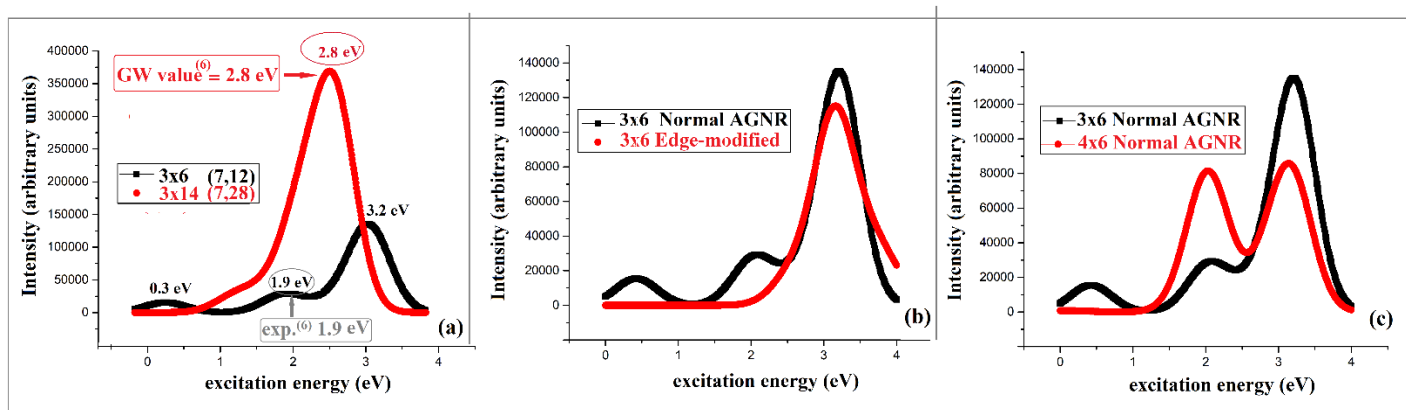

**FIGURE S2.** Comparisons of the spectra of 3x6 and 3x14 AGNRs and 4x6 AGNRs: (a) 3x6 and 3x14 normal AGNRs, (b) 3x6 normal and edge modified AGNRs, and (c) 3x6 and 4x6 (9,14) normal AGNRs.

In the spectrum of the 3x6 AGNR in Fig. S2(a) we can clearly see the  $\Delta\epsilon_{zz}$  peak (at 0.3 eV), between pure end states; the  $\Delta E_{zz}$  peak between mixt states at 1.9 eV ; and  $\Delta E_{ac}$  peak at 3.2 eV, in excellent agreement with experimental measurements of Wang *et al.*<sup>2</sup> On the other hand the “bulk” peak  $\Delta E_{ac}$  for the longer 3x14 AGNR has been shifted to 2.8 eV, which is in excellent agreement with the measurement and GW calculations of Wang *et al.*<sup>2</sup> for this AGNR. In Fig. S2(b) we can verify that the peak at 3.2 eV of the 3x6 AGNR is indeed a “bulk” peak since it dominates the spectrum of the corresponding edge modified AGNR,<sup>4</sup> whereas the “surface” peaks have disappeared. Finally in Fig. S2(c) we emphasize the similarity between the spectra of 3x6 and 4x6 AGNRs, which have the same length different width.

### #S3) 9-AGNRs (or 4x AGNRs)

In Fig. S3 we can observe the “bulk”  $\Delta E_{ac}$  peak of the 4x (9-AGNRs), which starts (for short lengths 4x13) at 1.6 eV and stabilizes to the value 1.45 eV for larger lengths (4x18, 4x24). The corresponding experimental value<sup>5</sup> is 1.4 eV.

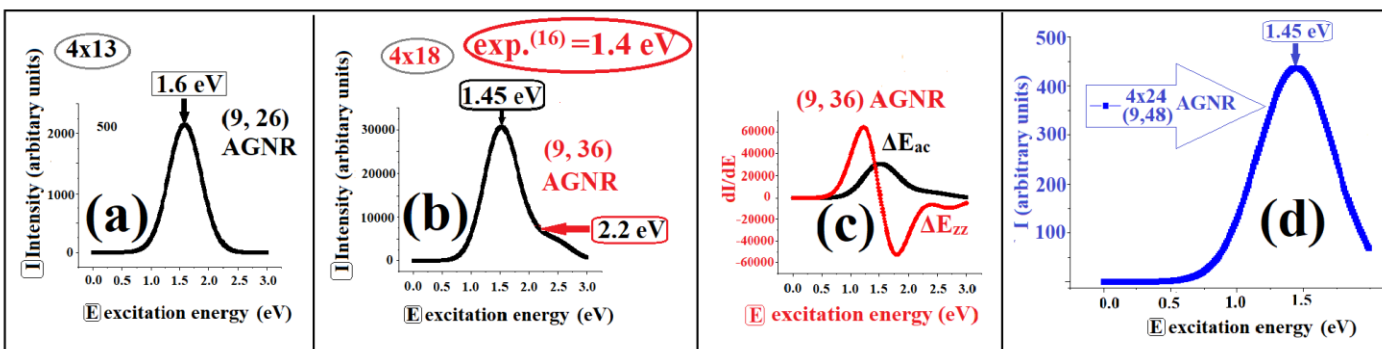

**FIGURE S3.** Comparison of the spectra of the 4x13, 4x18, and 4x24 AGNRs. (a) the 4x13 spectrum. (b) the 4x18 (b) AGNR spectrum. (c) the variation of intensity ( $I$ ) with energy ( $E$ ) for the 4x18 AGNR, i.e., the derivative  $dI/dE$ , which is given to emphasize the “surface”  $\Delta E_{zz}$  peak at  $\sim 2.2$  eV. (d) The corresponding spectrum of the 4x24 AGNR. The width of these three AGNRs is about 11.6 Å, and their lengths (including end-hydrogens) 56.4 Å, 77.8 Å, and 103.5 Å, respectively.

The edge modified 4x24 AGNR is described in Fig. S4.

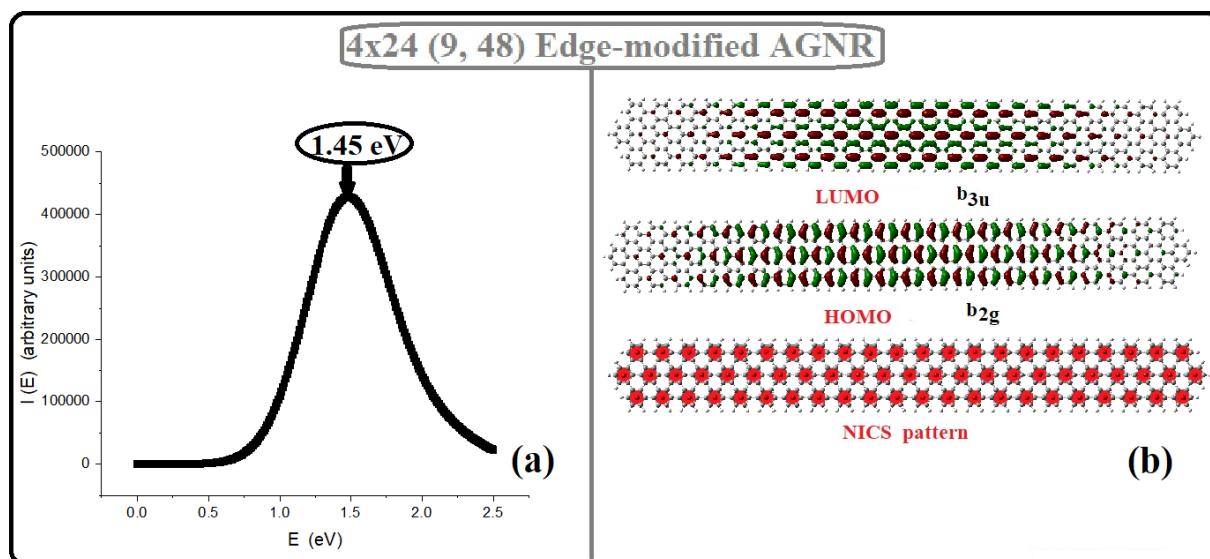

**FIGURE S4.** Edge-Modified 4x24 (9, 48) AGNR. (a) spectrum, and (b) HOMO, LUMO orbitals and aromaticity (NICS) pattern.

Observe that (by construction<sup>1</sup>) there are no “empty” edge-, or end-rings, and that the HOMO is characterized by even parity<sup>2</sup> (and LUMO with odd parity) similarly to hexagonal PAHs with odd shell number<sup>3</sup>. In full analogy to such PAHs (benzene, circum-coronene, etc.), the aromaticity pattern (CIRCO)<sup>3</sup> is fully compatible with Clar’s rules(s). In contrast, 3x AGNRs (as the 3x6, and 3x14 examined before) are characterized by odd parity HOMOs (and even parity LUMOs) associated with CO aromaticity pattern<sup>3</sup> (like Coronene, circum-circum-coronene, etc.). All these calculations have been performed with the Gaussian program package.<sup>1</sup>

## §S4 Cartesian Coordinates of 2x- AGNR Key Structures (in Å):

### 2x22 closed singlet

C 0.00000000 2.41689400 46.02708200  
C 0.00000000 1.22953100 46.71786900  
C 0.00000000 1.24151400 43.88815600  
C 0.00000000 2.42067700 44.62584100  
C 0.00000000 2.41456000 41.68489900  
C 0.00000000 1.23607000 42.42414700  
C 0.00000000 1.23232800 39.56170400  
C 0.00000000 2.41456500 40.29885200  
C 0.00000000 2.41518200 37.36521900  
C 0.00000000 1.23206700 38.10490600  
C 0.00000000 1.23240000 35.24114900  
C 0.00000000 2.41589000 35.98193200  
C 0.00000000 2.41690400 33.04652400  
C 0.00000000 1.23225900 33.78742500  
C 0.00000000 1.23226100 30.92337600  
C 0.00000000 2.41724500 31.66491200  
C 0.00000000 2.41783100 28.72970700  
C 0.00000000 1.23214300 29.47144100  
C 0.00000000 1.23213000 26.60706300  
C 0.00000000 2.41806900 27.34921700  
C 0.00000000 2.41851500 24.41409700  
C 0.00000000 1.23205100 25.15639600  
C 0.00000000 1.23204100 22.29180100  
C 0.00000000 2.41869600 23.03441800  
C 0.00000000 2.41903700 20.09935200  
C 0.00000000 1.23198200 20.84207700  
C 0.00000000 1.23197200 17.97732000  
C 0.00000000 2.41917600 18.72028300  
C 0.00000000 2.41943400 15.78526400  
C 0.00000000 1.23192600 16.52831000  
C 0.00000000 1.23192000 13.66343000  
C 0.00000000 2.41954000 14.40665500  
C 0.00000000 2.41972600 11.47166700  
C 0.00000000 1.23188400 12.21495400  
C 0.00000000 1.23188000 9.34998200  
C 0.00000000 2.41980100 10.09339500  
C 0.00000000 2.41992200 7.15842600  
C 0.00000000 1.23185600 7.90188100  
C 0.00000000 1.23185400 5.03684600  
C 0.00000000 2.41996700 5.78037600  
C 0.00000000 2.42002700 2.84541700  
C 0.00000000 1.23184100 3.58896800  
C 0.00000000 1.23184000 0.72390200

C 0.00000000 2.42004200 1.46747800  
C 0.00000000 2.42004200 -1.46747800  
C 0.00000000 1.23184000 -0.72390200  
C 0.00000000 1.23184100 -3.58896800  
C 0.00000000 2.42002700 -2.84541700  
C 0.00000000 2.41996700 -5.78037600  
C 0.00000000 1.23185400 -5.03684600  
C 0.00000000 1.23185600 -7.90188100  
C 0.00000000 2.41992200 -7.15842600  
C 0.00000000 2.41980100 -10.09339500  
C 0.00000000 1.23188000 -9.34998200  
C 0.00000000 1.23188400 -12.21495400  
C 0.00000000 2.41972600 -11.47166700  
C 0.00000000 2.41954000 -14.40665500  
C 0.00000000 1.23192000 -13.66343000  
C 0.00000000 1.23192600 -16.52831000  
C 0.00000000 2.41943400 -15.78526400  
C 0.00000000 2.41917600 -18.72028300  
C 0.00000000 1.23197200 -17.97732000  
C 0.00000000 1.23198200 -20.84207700  
C 0.00000000 2.41903700 -20.09935200  
C 0.00000000 2.41869600 -23.03441800  
C 0.00000000 1.23204100 -22.29180100  
C 0.00000000 1.23205100 -25.15639600  
C 0.00000000 2.41851500 -24.41409700  
C 0.00000000 2.41806900 -27.34921700  
C 0.00000000 1.23213000 -26.60706300  
C 0.00000000 1.23214300 -29.47144100  
C 0.00000000 2.41783100 -28.72970700  
C 0.00000000 2.41724500 -31.66491200  
C 0.00000000 1.23226100 -30.92337600  
C 0.00000000 1.23225900 -33.78742500  
C 0.00000000 2.41690400 -33.04652400  
C 0.00000000 2.41589000 -35.98193200  
C 0.00000000 1.23240000 -35.24114900  
C 0.00000000 1.23206700 -38.10490600  
C 0.00000000 2.41518200 -37.36521900  
C 0.00000000 2.41456500 -40.29885200  
C 0.00000000 1.23232800 -39.56170400  
C 0.00000000 1.23607000 -42.42414700  
C 0.00000000 2.41456000 -41.68489900  
C 0.00000000 2.42067700 -44.62584100  
C 0.00000000 1.24151400 -43.88815600  
C 0.00000000 1.22953100 -46.71786900  
C 0.00000000 2.41689400 -46.02708200  
C 0.00000000 0.00000000 46.02015900

C 0.00000000 -1.22953100 46.71786900  
C 0.00000000 -1.24151400 43.88815600  
C 0.00000000 0.00000000 44.59098400  
C 0.00000000 0.00000000 41.71256500  
C 0.00000000 -1.23607000 42.42414700  
C 0.00000000 -1.23232800 39.56170400  
C 0.00000000 0.00000000 40.27806200  
C 0.00000000 0.00000000 37.39001000  
C 0.00000000 -1.23206700 38.10490600  
C 0.00000000 -1.23240000 35.24114900  
C 0.00000000 0.00000000 35.95611600  
C 0.00000000 0.00000000 33.07258000  
C 0.00000000 -1.23225900 33.78742500  
C 0.00000000 -1.23226100 30.92337600  
C 0.00000000 0.00000000 31.63843400  
C 0.00000000 0.00000000 28.75649100  
C 0.00000000 -1.23214300 29.47144100  
C 0.00000000 -1.23213000 26.60706300  
C 0.00000000 0.00000000 27.32216800  
C 0.00000000 0.00000000 24.44137500  
C 0.00000000 -1.23205100 25.15639600  
C 0.00000000 -1.23204100 22.29180100  
C 0.00000000 0.00000000 23.00693600  
C 0.00000000 0.00000000 20.12700500  
C 0.00000000 -1.23198200 20.84207700  
C 0.00000000 -1.23197200 17.97732000  
C 0.00000000 0.00000000 18.69248100  
C 0.00000000 0.00000000 15.81320000  
C 0.00000000 -1.23192600 16.52831000  
C 0.00000000 -1.23192000 13.66343000  
C 0.00000000 0.00000000 14.37861200  
C 0.00000000 0.00000000 11.49981200  
C 0.00000000 -1.23188400 12.21495400  
C 0.00000000 -1.23188000 9.34998200  
C 0.00000000 0.00000000 10.06517700  
C 0.00000000 0.00000000 7.18671300  
C 0.00000000 -1.23185600 7.90188100  
C 0.00000000 -1.23185400 5.03684600  
C 0.00000000 0.00000000 5.75204600  
C 0.00000000 0.00000000 2.87378200  
C 0.00000000 -1.23184100 3.58896800  
C 0.00000000 -1.23184000 0.72390200  
C 0.00000000 0.00000000 1.43909900  
C 0.00000000 0.00000000 -1.43909900  
C 0.00000000 -1.23184000 -0.72390200  
C 0.00000000 -1.23184100 -3.58896800



C 0.00000000 0.00000000 -2.87378200  
C 0.00000000 0.00000000 -5.75204600  
C 0.00000000 -1.23185400 -5.03684600  
C 0.00000000 -1.23185600 -7.90188100  
C 0.00000000 0.00000000 -7.18671300  
C 0.00000000 0.00000000 -10.06517700  
C 0.00000000 -1.23188000 -9.34998200  
C 0.00000000 -1.23188400 -12.21495400  
C 0.00000000 0.00000000 -11.49981200  
C 0.00000000 0.00000000 -14.37861200  
C 0.00000000 -1.23192000 -13.66343000  
C 0.00000000 -1.23192600 -16.52831000  
C 0.00000000 0.00000000 -15.81320000  
C 0.00000000 0.00000000 -18.69248100  
C 0.00000000 -1.23197200 -17.97732000  
C 0.00000000 -1.23198200 -20.84207700  
C 0.00000000 0.00000000 -20.12700500  
C 0.00000000 0.00000000 -23.00693600  
C 0.00000000 -1.23204100 -22.29180100  
C 0.00000000 -1.23205100 -25.15639600  
C 0.00000000 0.00000000 -24.44137500  
C 0.00000000 0.00000000 -27.32216800  
C 0.00000000 -1.23213000 -26.60706300  
C 0.00000000 -1.23214300 -29.47144100  
C 0.00000000 0.00000000 -28.75649100  
C 0.00000000 0.00000000 -31.63843400  
C 0.00000000 -1.23226100 -30.92337600  
C 0.00000000 -1.23225900 -33.78742500  
C 0.00000000 0.00000000 -33.07258000  
C 0.00000000 0.00000000 -35.95611600  
C 0.00000000 -1.23240000 -35.24114900  
C 0.00000000 -1.23206700 -38.10490600  
C 0.00000000 0.00000000 -37.39001000  
C 0.00000000 0.00000000 -40.27806200  
C 0.00000000 -1.23232800 -39.56170400  
C 0.00000000 -1.23607000 -42.42414700  
C 0.00000000 0.00000000 -41.71256500  
C 0.00000000 0.00000000 -44.59098400  
C 0.00000000 -1.24151400 -43.88815600  
C 0.00000000 -1.22953100 -46.71786900  
C 0.00000000 0.00000000 -46.02015900  
C 0.00000000 -2.41689400 46.02708200  
C 0.00000000 -2.42067700 44.62584100  
C 0.00000000 -2.41456000 41.68489900  
C 0.00000000 -2.41456500 40.29885200  
C 0.00000000 -2.41518200 37.36521900

C 0.00000000 -2.41589000 35.98193200  
C 0.00000000 -2.41690400 33.04652400  
C 0.00000000 -2.41724500 31.66491200  
C 0.00000000 -2.41783100 28.72970700  
C 0.00000000 -2.41806900 27.34921700  
C 0.00000000 -2.41851500 24.41409700  
C 0.00000000 -2.41869600 23.03441800  
C 0.00000000 -2.41903700 20.09935200  
C 0.00000000 -2.41917600 18.72028300  
C 0.00000000 -2.41943400 15.78526400  
C 0.00000000 -2.41954000 14.40665500  
C 0.00000000 -2.41972600 11.47166700  
C 0.00000000 -2.41980100 10.09339500  
C 0.00000000 -2.41992200 7.15842600  
C 0.00000000 -2.41996700 5.78037600  
C 0.00000000 -2.42002700 2.84541700  
C 0.00000000 -2.42004200 1.46747800  
C 0.00000000 -2.42004200 -1.46747800  
C 0.00000000 -2.42002700 -2.84541700  
C 0.00000000 -2.41996700 -5.78037600  
C 0.00000000 -2.41992200 -7.15842600  
C 0.00000000 -2.41980100 -10.09339500  
C 0.00000000 -2.41972600 -11.47166700  
C 0.00000000 -2.41954000 -14.40665500  
C 0.00000000 -2.41943400 -15.78526400  
C 0.00000000 -2.41917600 -18.72028300  
C 0.00000000 -2.41903700 -20.09935200  
C 0.00000000 -2.41869600 -23.03441800  
C 0.00000000 -2.41851500 -24.41409700  
C 0.00000000 -2.41806900 -27.34921700  
C 0.00000000 -2.41783100 -28.72970700  
C 0.00000000 -2.41724500 -31.66491200  
C 0.00000000 -2.41690400 -33.04652400  
C 0.00000000 -2.41589000 -35.98193200  
C 0.00000000 -2.41518200 -37.36521900  
C 0.00000000 -2.41456500 -40.29885200  
C 0.00000000 -2.41456000 -41.68489900  
C 0.00000000 -2.42067700 -44.62584100  
C 0.00000000 -2.41689400 -46.02708200  
H 0.00000000 -3.36281200 46.56160800  
H 0.00000000 -3.38088600 44.12226900  
H 0.00000000 -3.37536500 42.18724800  
H 0.00000000 -3.37499000 39.79621300  
H 0.00000000 -3.37548500 37.86815000  
H 0.00000000 -3.37645200 35.47954000  
H 0.00000000 -3.37691700 33.54997800

H 0.00000000 -3.37743300 31.16188100  
H 0.00000000 -3.37772100 29.23331800  
H 0.00000000 -3.37806700 26.84586600  
H 0.00000000 -3.37830000 24.91786000  
H 0.00000000 -3.37856200 22.53085200  
H 0.00000000 -3.37874500 20.60322500  
H 0.00000000 -3.37894400 18.21655700  
H 0.00000000 -3.37908200 16.28922300  
H 0.00000000 -3.37923200 13.90280500  
H 0.00000000 -3.37932900 11.97569200  
H 0.00000000 -3.37943500 9.58944700  
H 0.00000000 -3.37949600 7.66249200  
H 0.00000000 -3.37956000 5.27635600  
H 0.00000000 -3.37958900 3.34949700  
H 0.00000000 -3.37961000 0.96341300  
H 0.00000000 -3.37961000 -0.96341300  
H 0.00000000 -3.37958900 -3.34949700  
H 0.00000000 -3.37956000 -5.27635600  
H 0.00000000 -3.37949600 -7.66249200  
H 0.00000000 -3.37943500 -9.58944700  
H 0.00000000 -3.37932900 -11.97569200  
H 0.00000000 -3.37923200 -13.90280500  
H 0.00000000 -3.37908200 -16.28922300  
H 0.00000000 -3.37894400 -18.21655700  
H 0.00000000 -3.37874500 -20.60322500  
H 0.00000000 -3.37856200 -22.53085200  
H 0.00000000 -3.37830000 -24.91786000  
H 0.00000000 -3.37806700 -26.84586600  
H 0.00000000 -3.37772100 -29.23331800  
H 0.00000000 -3.37743300 -31.16188100  
H 0.00000000 -3.37691700 -33.54997800  
H 0.00000000 -3.37645200 -35.47954000  
H 0.00000000 -3.37548500 -37.86815000  
H 0.00000000 -3.37499000 -39.79621300  
H 0.00000000 -3.37536500 -42.18724800  
H 0.00000000 -3.38088600 -44.12226900  
H 0.00000000 -3.36281200 -46.56160800  
H 0.00000000 3.36281200 46.56160800  
H 0.00000000 3.38088600 44.12226900  
H 0.00000000 3.37536500 42.18724800  
H 0.00000000 3.37499000 39.79621300  
H 0.00000000 3.37548500 37.86815000  
H 0.00000000 3.37645200 35.47954000  
H 0.00000000 3.37691700 33.54997800  
H 0.00000000 3.37743300 31.16188100  
H 0.00000000 3.37772100 29.23331800

H 0.00000000 3.37806700 26.84586600  
H 0.00000000 3.37830000 24.91786000  
H 0.00000000 3.37856200 22.53085200  
H 0.00000000 3.37874500 20.60322500  
H 0.00000000 3.37894400 18.21655700  
H 0.00000000 3.37908200 16.28922300  
H 0.00000000 3.37923200 13.90280500  
H 0.00000000 3.37932900 11.97569200  
H 0.00000000 3.37943500 9.58944700  
H 0.00000000 3.37949600 7.66249200  
H 0.00000000 3.37956000 5.27635600  
H 0.00000000 3.37958900 3.34949700  
H 0.00000000 3.37961000 0.96341300  
H 0.00000000 3.37961000 -0.96341300  
H 0.00000000 3.37958900 -3.34949700  
H 0.00000000 3.37956000 -5.27635600  
H 0.00000000 3.37949600 -7.66249200  
H 0.00000000 3.37943500 -9.58944700  
H 0.00000000 3.37932900 -11.97569200  
H 0.00000000 3.37923200 -13.90280500  
H 0.00000000 3.37908200 -16.28922300  
H 0.00000000 3.37894400 -18.21655700  
H 0.00000000 3.37874500 -20.60322500  
H 0.00000000 3.37856200 -22.53085200  
H 0.00000000 3.37830000 -24.91786000  
H 0.00000000 3.37806700 -26.84586600  
H 0.00000000 3.37772100 -29.23331800  
H 0.00000000 3.37743300 -31.16188100  
H 0.00000000 3.37691700 -33.54997800  
H 0.00000000 3.37645200 -35.47954000  
H 0.00000000 3.37548500 -37.86815000  
H 0.00000000 3.37499000 -39.79621300  
H 0.00000000 3.37536500 -42.18724800  
H 0.00000000 3.38088600 -44.12226900  
H 0.00000000 3.36281200 -46.56160800  
H 0.00000000 1.21649000 -47.80487200  
H 0.00000000 -1.21649000 -47.80487200  
H 0.00000000 1.21649000 47.80487200  
H 0.00000000 -1.21649000 47.80487200

---

## 2x22 Open Singlet

open singlet 2x22 trying triplet

C -45.89568000 2.41857400 0.00000000

C -46.58692300 1.22941600 0.00000000

C -43.75661400 1.24122900 0.00000000

C -44.49650300 2.42357400 0.00000000  
C -41.55582300 2.41993300 0.00000000  
C -42.29804000 1.23538400 0.00000000  
C -39.43400300 1.23169100 0.00000000  
C -40.17589800 2.42110400 0.00000000  
C -37.24275000 2.42362000 0.00000000  
C -37.98779400 1.23102200 0.00000000  
C -35.12155100 1.23136300 0.00000000  
C -35.86887000 2.42518300 0.00000000  
C -32.93411100 2.42735200 0.00000000  
C -33.68194900 1.23093500 0.00000000  
C -30.81484600 1.23095200 0.00000000  
C -31.56399800 2.42825700 0.00000000  
C -28.62956500 2.42946900 0.00000000  
C -29.37914800 1.23064800 0.00000000  
C -26.51139300 1.23066000 0.00000000  
C -27.26177700 2.43005400 0.00000000  
C -24.32746200 2.43079900 0.00000000  
C -25.07811400 1.23046400 0.00000000  
C -22.20997000 1.23047800 0.00000000  
C -22.96112500 2.43118200 0.00000000  
C -20.02688400 2.43164100 0.00000000  
C -20.77820600 1.23034900 0.00000000  
C -17.90982400 1.23036300 0.00000000  
C -18.66146300 2.43189300 0.00000000  
C -15.72727200 2.43217600 0.00000000  
C -16.47901400 1.23027900 0.00000000  
C -13.61048700 1.23029000 0.00000000  
C -14.36242900 2.43233900 0.00000000  
C -11.42827100 2.43251000 0.00000000  
C -12.18027400 1.23023700 0.00000000  
C -9.31166100 1.23024600 0.00000000  
C -10.06378500 2.43261200 0.00000000  
C -7.12964900 2.43270900 0.00000000  
C -7.88180700 1.23021500 0.00000000  
C -5.01314600 1.23022000 0.00000000  
C -5.76536900 2.43276500 0.00000000  
C -2.83124500 2.43280900 0.00000000  
C -3.58348400 1.23020600 0.00000000  
C -0.71480200 1.23020800 0.00000000  
C -1.46706100 2.43282600 0.00000000  
C 1.46706000 2.43282600 0.00000000  
C 0.71480100 1.23020800 0.00000000  
C 3.58348300 1.23020600 0.00000000  
C 2.83124500 2.43280900 0.00000000  
C 5.76537000 2.43276500 0.00000000

C 5.01314600 1.23022000 0.00000000  
C 7.88180700 1.23021500 0.00000000  
C 7.12964900 2.43270900 0.00000000  
C 10.06378500 2.43261200 0.00000000  
C 9.31166100 1.23024600 0.00000000  
C 12.18027300 1.23023700 0.00000000  
C 11.42827100 2.43251000 0.00000000  
C 14.36242800 2.43233900 0.00000000  
C 13.61048700 1.23029000 0.00000000  
C 16.47901300 1.23027900 0.00000000  
C 15.72727200 2.43217600 0.00000000  
C 18.66146300 2.43189300 0.00000000  
C 17.90982400 1.23036300 0.00000000  
C 20.77820500 1.23034900 0.00000000  
C 20.02688400 2.43164100 0.00000000  
C 22.96112500 2.43118200 0.00000000  
C 22.20997000 1.23047800 0.00000000  
C 25.07811400 1.23046400 0.00000000  
C 24.32746200 2.43079900 0.00000000  
C 27.26177700 2.43005400 0.00000000  
C 26.51139300 1.23066000 0.00000000  
C 29.37914800 1.23064800 0.00000000  
C 28.62956500 2.42946900 0.00000000  
C 31.56399800 2.42825700 0.00000000  
C 30.81484600 1.23095200 0.00000000  
C 33.68194900 1.23093500 0.00000000  
C 32.93411100 2.42735200 0.00000000  
C 35.86887000 2.42518300 0.00000000  
C 35.12155200 1.23136300 0.00000000  
C 37.98779400 1.23102200 0.00000000  
C 37.24275000 2.42362000 0.00000000  
C 40.17589900 2.42110400 0.00000000  
C 39.43400300 1.23169100 0.00000000  
C 42.29804000 1.23538400 0.00000000  
C 41.55582400 2.41993300 0.00000000  
C 44.49650300 2.42357400 0.00000000  
C 43.75661500 1.24122900 0.00000000  
C 46.58692300 1.22941600 0.00000000  
C 45.89568100 2.41857400 0.00000000  
C -45.88947100 0.00000000 0.00000000  
C -46.58692300 -1.22941600 0.00000000  
C -43.75661400 -1.24122900 0.00000000  
C -44.46004600 0.00000000 0.00000000  
C -41.58641100 0.00000000 0.00000000  
C -42.29804000 -1.23538400 0.00000000  
C -39.43400300 -1.23169200 0.00000000

C -40.15107600 0.00000000 0.00000000  
C -37.27256900 0.00000000 0.00000000  
C -37.98779400 -1.23102200 0.00000000  
C -35.12155100 -1.23136300 0.00000000  
C -35.83740100 0.00000000 0.00000000  
C -32.96653100 0.00000000 0.00000000  
C -33.68194900 -1.23093500 0.00000000  
C -30.81484600 -1.23095200 0.00000000  
C -31.53083700 0.00000000 0.00000000  
C -28.66347100 0.00000000 0.00000000  
C -29.37914800 -1.23064800 0.00000000  
C -26.51139300 -1.23066000 0.00000000  
C -27.22744200 0.00000000 0.00000000  
C -24.36227800 0.00000000 0.00000000  
C -25.07811400 -1.23046400 0.00000000  
C -22.20997000 -1.23047800 0.00000000  
C -22.92604100 0.00000000 0.00000000  
C -20.06227300 0.00000000 0.00000000  
C -20.77820600 -1.23034900 0.00000000  
C -17.90982400 -1.23036300 0.00000000  
C -18.62590500 0.00000000 0.00000000  
C -15.76302200 0.00000000 0.00000000  
C -16.47901400 -1.23027900 0.00000000  
C -13.61048700 -1.23029000 0.00000000  
C -14.32657100 0.00000000 0.00000000  
C -11.46424600 0.00000000 0.00000000  
C -12.18027400 -1.23023700 0.00000000  
C -9.31166100 -1.23024600 0.00000000  
C -10.02774300 0.00000000 0.00000000  
C -7.16575700 0.00000000 0.00000000  
C -7.88180700 -1.23021500 0.00000000  
C -5.01314600 -1.23022000 0.00000000  
C -5.72922500 0.00000000 0.00000000  
C -2.86742000 0.00000000 0.00000000  
C -3.58348400 -1.23020600 0.00000000  
C -0.71480200 -1.23020800 0.00000000  
C -1.43087400 0.00000000 0.00000000  
C 1.43087400 0.00000000 0.00000000  
C 0.71480100 -1.23020800 0.00000000  
C 3.58348300 -1.23020600 0.00000000  
C 2.86742000 0.00000000 0.00000000  
C 5.72922500 0.00000000 0.00000000  
C 5.01314600 -1.23022000 0.00000000  
C 7.88180700 -1.23021500 0.00000000  
C 7.16575700 0.00000000 0.00000000  
C 10.02774300 0.00000000 0.00000000

C 9.31166100 -1.23024600 0.00000000  
C 12.18027300 -1.23023700 0.00000000  
C 11.46424600 0.00000000 0.00000000  
C 14.32657100 0.00000000 0.00000000  
C 13.61048700 -1.23029000 0.00000000  
C 16.47901300 -1.23027900 0.00000000  
C 15.76302200 0.00000000 0.00000000  
C 18.62590500 0.00000000 0.00000000  
C 17.90982400 -1.23036300 0.00000000  
C 20.77820500 -1.23034900 0.00000000  
C 20.06227300 0.00000000 0.00000000  
C 22.92604100 0.00000000 0.00000000  
C 22.20997000 -1.23047800 0.00000000  
C 25.07811400 -1.23046400 0.00000000  
C 24.36227800 0.00000000 0.00000000  
C 27.22744200 0.00000000 0.00000000  
C 26.51139300 -1.23066000 0.00000000  
C 29.37914800 -1.23064800 0.00000000  
C 28.66347100 0.00000000 0.00000000  
C 31.53083700 0.00000000 0.00000000  
C 30.81484600 -1.23095200 0.00000000  
C 33.68194900 -1.23093500 0.00000000  
C 32.96653100 0.00000000 0.00000000  
C 35.83740100 0.00000000 0.00000000  
C 35.12155200 -1.23136300 0.00000000  
C 37.98779400 -1.23102200 0.00000000  
C 37.27257000 0.00000000 0.00000000  
C 40.15107600 0.00000000 0.00000000  
C 39.43400300 -1.23169200 0.00000000  
C 42.29804000 -1.23538400 0.00000000  
C 41.58641200 0.00000000 0.00000000  
C 44.46004600 0.00000000 0.00000000  
C 43.75661500 -1.24122900 0.00000000  
C 46.58692300 -1.22941600 0.00000000  
C 45.88947100 0.00000000 0.00000000  
C -45.89568000 -2.41857400 0.00000000  
C -44.49650300 -2.42357400 0.00000000  
C -41.55582300 -2.41993300 0.00000000  
C -40.17589800 -2.42110500 0.00000000  
C -37.24275000 -2.42362000 0.00000000  
C -35.86887000 -2.42518300 0.00000000  
C -32.93411100 -2.42735200 0.00000000  
C -31.56399800 -2.42825700 0.00000000  
C -28.62956500 -2.42946900 0.00000000  
C -27.26177700 -2.43005400 0.00000000  
C -24.32746200 -2.43079900 0.00000000



C -22.96112500 -2.43118200 0.00000000  
C -20.02688400 -2.43164100 0.00000000  
C -18.66146300 -2.43189300 0.00000000  
C -15.72727200 -2.43217600 0.00000000  
C -14.36242900 -2.43233900 0.00000000  
C -11.42827100 -2.43251000 0.00000000  
C -10.06378500 -2.43261200 0.00000000  
C -7.12964900 -2.43270900 0.00000000  
C -5.76536900 -2.43276500 0.00000000  
C -2.83124500 -2.43280900 0.00000000  
C -1.46706100 -2.43282600 0.00000000  
C 1.46706000 -2.43282600 0.00000000  
C 2.83124500 -2.43280900 0.00000000  
C 5.76537000 -2.43276500 0.00000000  
C 7.12964900 -2.43270900 0.00000000  
C 10.06378500 -2.43261200 0.00000000  
C 11.42827100 -2.43251000 0.00000000  
C 14.36242800 -2.43233900 0.00000000  
C 15.72727200 -2.43217600 0.00000000  
C 18.66146300 -2.43189300 0.00000000  
C 20.02688400 -2.43164100 0.00000000  
C 22.96112500 -2.43118200 0.00000000  
C 24.32746200 -2.43079900 0.00000000  
C 27.26177700 -2.43005400 0.00000000  
C 28.62956500 -2.42946900 0.00000000  
C 31.56399800 -2.42825700 0.00000000  
C 32.93411100 -2.42735200 0.00000000  
C 35.86887000 -2.42518300 0.00000000  
C 37.24275000 -2.42362000 0.00000000  
C 40.17589900 -2.42110400 0.00000000  
C 41.55582400 -2.41993300 0.00000000  
C 44.49650300 -2.42357400 0.00000000  
C 45.89568100 -2.41857400 0.00000000  
H 43.99279600 -3.38356000 0.00000000  
H 46.43146400 -3.36381900 0.00000000  
H -46.43146400 -3.36381900 0.00000000  
H -43.99279500 -3.38356000 0.00000000  
H -42.06063400 -3.37933200 0.00000000  
H -39.67192400 -3.38056700 0.00000000  
H -37.74889800 -3.38202200 0.00000000  
H -35.36408500 -3.38415800 0.00000000  
H -33.44118900 -3.38516700 0.00000000  
H -31.05783500 -3.38643400 0.00000000  
H -29.13705600 -3.38698100 0.00000000  
H -26.75485400 -3.38779000 0.00000000  
H -24.83522800 -3.38811300 0.00000000

H -22.45372800 -3.38864200 0.00000000  
H -20.53481900 -3.38883200 0.00000000  
H -18.15377100 -3.38917900 0.00000000  
H -16.23530700 -3.38929200 0.00000000  
H -13.85455300 -3.38951800 0.00000000  
H -11.93636000 -3.38958300 0.00000000  
H -9.55579600 -3.38972400 0.00000000  
H -7.63776200 -3.38976000 0.00000000  
H -5.25731200 -3.38983700 0.00000000  
H -3.33936000 -3.38985300 0.00000000  
H -0.95896400 -3.38987800 0.00000000  
H 0.95896400 -3.38987800 0.00000000  
H 3.33935900 -3.38985300 0.00000000  
H 5.25731200 -3.38983700 0.00000000  
H 7.63776200 -3.38976000 0.00000000  
H 9.55579700 -3.38972400 0.00000000  
H 11.93636000 -3.38958300 0.00000000  
H 13.85455300 -3.38951800 0.00000000  
H 16.23530600 -3.38929200 0.00000000  
H 18.15377100 -3.38917900 0.00000000  
H 20.53481900 -3.38883200 0.00000000  
H 22.45372900 -3.38864200 0.00000000  
H 24.83522800 -3.38811300 0.00000000  
H 26.75485400 -3.38779000 0.00000000  
H 29.13705600 -3.38698100 0.00000000  
H 31.05783500 -3.38643400 0.00000000  
H 33.44118900 -3.38516700 0.00000000  
H 35.36408500 -3.38415800 0.00000000  
H 37.74889800 -3.38202200 0.00000000  
H 39.67192400 -3.38056700 0.00000000  
H 42.06063400 -3.37933200 0.00000000  
H -46.43146400 3.36381900 0.00000000  
H -43.99279500 3.38356000 0.00000000  
H -42.06063400 3.37933200 0.00000000  
H -39.67192400 3.38056700 0.00000000  
H -37.74889800 3.38202200 0.00000000  
H -35.36408500 3.38415800 0.00000000  
H -33.44118900 3.38516700 0.00000000  
H -31.05783500 3.38643400 0.00000000  
H -29.13705600 3.38698100 0.00000000  
H -26.75485400 3.38779000 0.00000000  
H -24.83522800 3.38811300 0.00000000  
H -22.45372800 3.38864200 0.00000000  
H -20.53481900 3.38883200 0.00000000  
H -18.15377100 3.38917900 0.00000000  
H -16.23530700 3.38929200 0.00000000

H -13.85455300 3.38951800 0.00000000  
H -11.93636000 3.38958300 0.00000000  
H -9.55579600 3.38972400 0.00000000  
H -7.63776200 3.38976000 0.00000000  
H -5.25731200 3.38983700 0.00000000  
H -3.33936000 3.38985300 0.00000000  
H -0.95896400 3.38987800 0.00000000  
H 0.95896400 3.38987800 0.00000000  
H 3.33935900 3.38985300 0.00000000  
H 5.25731200 3.38983700 0.00000000  
H 7.63776200 3.38976000 0.00000000  
H 9.55579700 3.38972400 0.00000000  
H 11.93636000 3.38958300 0.00000000  
H 13.85455300 3.38951800 0.00000000  
H 16.23530600 3.38929200 0.00000000  
H 18.15377100 3.38917900 0.00000000  
H 20.53481900 3.38883200 0.00000000  
H 22.45372900 3.38864200 0.00000000  
H 24.83522800 3.38811300 0.00000000  
H 26.75485400 3.38779000 0.00000000  
H 29.13705600 3.38698100 0.00000000  
H 31.05783500 3.38643400 0.00000000  
H 33.44118900 3.38516700 0.00000000  
H 35.36408500 3.38415800 0.00000000  
H 37.74889800 3.38202200 0.00000000  
H 39.67192400 3.38056700 0.00000000  
H 42.06063400 3.37933200 0.00000000  
H 43.99279600 3.38356000 0.00000000  
H 46.43146400 3.36381900 0.00000000  
H 47.67391700 1.21669300 0.00000000  
H 47.67391700 -1.21669300 0.00000000  
H -47.67391600 1.21669300 0.00000000  
H -47.67391600 -1.21669300 0.00000000

-----  
**2x23 Closed Singlet**

C 0.00000000 2.41723000 48.08701500  
C 0.00000000 1.22943500 48.77799400  
C 0.00000000 1.24140700 45.94803200  
C 0.00000000 2.42145500 46.68647800  
C 0.00000000 2.41603100 43.74557200  
C 0.00000000 1.23580700 44.48578700  
C 0.00000000 1.23211200 41.62277700  
C 0.00000000 2.41656200 42.36160900  
C 0.00000000 2.41804700 39.42824200

C 0.00000000 1.23161200 40.16990000  
C 0.00000000 1.23200200 37.30513100  
C 0.00000000 2.41939500 38.04878200  
C 0.00000000 2.42133700 35.11363000  
C 0.00000000 1.23159200 35.85771900  
C 0.00000000 1.23163200 32.99216300  
C 0.00000000 2.42233900 33.73769300  
C 0.00000000 2.42383000 30.80293000  
C 0.00000000 1.23125000 31.54897500  
C 0.00000000 1.23128600 28.68263400  
C 0.00000000 2.42469300 29.42986500  
C 0.00000000 2.42592300 26.49524200  
C 0.00000000 1.23096700 27.24288400  
C 0.00000000 1.23099600 24.37591200  
C 0.00000000 2.42663100 25.12449300  
C 0.00000000 2.42759700 22.18997900  
C 0.00000000 1.23074300 22.93887700  
C 0.00000000 1.23076600 20.07141300  
C 0.00000000 2.42814700 20.82102000  
C 0.00000000 2.42886500 17.88658200  
C 0.00000000 1.23057500 18.63642000  
C 0.00000000 1.23059300 15.76859100  
C 0.00000000 2.42926800 16.51893700  
C 0.00000000 2.42976900 13.58455000  
C 0.00000000 1.23045800 14.33505600  
C 0.00000000 1.23047000 11.46697200  
C 0.00000000 2.43004500 12.21781900  
C 0.00000000 2.43036900 9.28346700  
C 0.00000000 1.23038300 10.03441600  
C 0.00000000 1.23039100 7.16616700  
C 0.00000000 2.43054000 7.91732300  
C 0.00000000 2.43072000 4.98299300  
C 0.00000000 1.23034100 5.73420600  
C 0.00000000 1.23034600 2.86586600  
C 0.00000000 2.43080200 3.61717700  
C 0.00000000 2.43086000 0.68285600  
C 0.00000000 1.23032900 1.43418800  
C 0.00000000 1.23032900 -1.43418800  
C 0.00000000 2.43086000 -0.68285600  
C 0.00000000 2.43080200 -3.61717700  
C 0.00000000 1.23034600 -2.86586600  
C 0.00000000 1.23034100 -5.73420600  
C 0.00000000 2.43072000 -4.98299300  
C 0.00000000 2.43054000 -7.91732300  
C 0.00000000 1.23039100 -7.16616700  
C 0.00000000 1.23038300 -10.03441600

C 0.00000000 2.43036900 -9.28346700  
C 0.00000000 2.43004500 -12.21781900  
C 0.00000000 1.23047000 -11.46697200  
C 0.00000000 1.23045800 -14.33505600  
C 0.00000000 2.42976900 -13.58455000  
C 0.00000000 2.42926800 -16.51893700  
C 0.00000000 1.23059300 -15.76859100  
C 0.00000000 1.23057500 -18.63642000  
C 0.00000000 2.42886500 -17.88658200  
C 0.00000000 2.42814700 -20.82102000  
C 0.00000000 1.23076600 -20.07141300  
C 0.00000000 1.23074300 -22.93887700  
C 0.00000000 2.42759700 -22.18997900  
C 0.00000000 2.42663100 -25.12449300  
C 0.00000000 1.23099600 -24.37591200  
C 0.00000000 1.23096700 -27.24288400  
C 0.00000000 2.42592300 -26.49524200  
C 0.00000000 2.42469300 -29.42986500  
C 0.00000000 1.23128600 -28.68263400  
C 0.00000000 1.23125000 -31.54897500  
C 0.00000000 2.42383000 -30.80293000  
C 0.00000000 2.42233900 -33.73769300  
C 0.00000000 1.23163200 -32.99216300  
C 0.00000000 1.23159200 -35.85771900  
C 0.00000000 2.42133700 -35.11363000  
C 0.00000000 2.41939500 -38.04878200  
C 0.00000000 1.23200200 -37.30513100  
C 0.00000000 1.23161200 -40.16990000  
C 0.00000000 2.41804700 -39.42824200  
C 0.00000000 2.41656200 -42.36160900  
C 0.00000000 1.23211200 -41.62277700  
C 0.00000000 1.23580700 -44.48578700  
C 0.00000000 2.41603100 -43.74557200  
C 0.00000000 2.42145500 -46.68647800  
C 0.00000000 1.24140700 -45.94803200  
C 0.00000000 1.22943500 -48.77799400  
C 0.00000000 2.41723000 -48.08701500  
C 0.00000000 0.00000000 48.08036000  
C 0.00000000 -1.22943500 48.77799400  
C 0.00000000 -1.24140700 45.94803200  
C 0.00000000 0.00000000 46.65107600  
C 0.00000000 0.00000000 43.77422600  
C 0.00000000 -1.23580700 44.48578700  
C 0.00000000 -1.23211200 41.62277700  
C 0.00000000 0.00000000 42.33940200  
C 0.00000000 0.00000000 39.45498900

C 0.00000000 -1.23161200 40.16990000  
C 0.00000000 -1.23200200 37.30513100  
C 0.00000000 0.00000000 38.02050800  
C 0.00000000 0.00000000 35.14277200  
C 0.00000000 -1.23159200 35.85771900  
C 0.00000000 -1.23163200 32.99216300  
C 0.00000000 0.00000000 33.70776100  
C 0.00000000 0.00000000 30.83380800  
C 0.00000000 -1.23125000 31.54897500  
C 0.00000000 -1.23128600 28.68263400  
C 0.00000000 0.00000000 29.39837000  
C 0.00000000 0.00000000 26.52752000  
C 0.00000000 -1.23096700 27.24288400  
C 0.00000000 -1.23099600 24.37591200  
C 0.00000000 0.00000000 25.09174500  
C 0.00000000 0.00000000 22.22334300  
C 0.00000000 -1.23074300 22.93887700  
C 0.00000000 -1.23076600 20.07141300  
C 0.00000000 0.00000000 20.78731200  
C 0.00000000 0.00000000 17.92074700  
C 0.00000000 -1.23057500 18.63642000  
C 0.00000000 -1.23059300 15.76859100  
C 0.00000000 0.00000000 16.48453200  
C 0.00000000 0.00000000 13.61927600  
C 0.00000000 -1.23045800 14.33505600  
C 0.00000000 -1.23047000 11.46697200  
C 0.00000000 0.00000000 12.18293500  
C 0.00000000 0.00000000 9.31855800  
C 0.00000000 -1.23038300 10.03441600  
C 0.00000000 -1.23039100 7.16616700  
C 0.00000000 0.00000000 7.88213800  
C 0.00000000 0.00000000 5.01829500  
C 0.00000000 -1.23034100 5.73420600  
C 0.00000000 -1.23034600 2.86586600  
C 0.00000000 0.00000000 3.58183300  
C 0.00000000 0.00000000 0.71823700  
C 0.00000000 -1.23032900 1.43418800  
C 0.00000000 -1.23032900 -1.43418800  
C 0.00000000 0.00000000 -0.71823700  
C 0.00000000 0.00000000 -3.58183300  
C 0.00000000 -1.23034600 -2.86586600  
C 0.00000000 -1.23034100 -5.73420600  
C 0.00000000 0.00000000 -5.01829500  
C 0.00000000 0.00000000 -7.88213800  
C 0.00000000 -1.23039100 -7.16616700  
C 0.00000000 -1.23038300 -10.03441600

C 0.00000000 0.00000000 -9.31855800  
C 0.00000000 0.00000000 -12.18293500  
C 0.00000000 -1.23047000 -11.46697200  
C 0.00000000 -1.23045800 -14.33505600  
C 0.00000000 0.00000000 -13.61927600  
C 0.00000000 0.00000000 -16.48453200  
C 0.00000000 -1.23059300 -15.76859100  
C 0.00000000 -1.23057500 -18.63642000  
C 0.00000000 0.00000000 -17.92074700  
C 0.00000000 0.00000000 -20.78731200  
C 0.00000000 -1.23076600 -20.07141300  
C 0.00000000 -1.23074300 -22.93887700  
C 0.00000000 0.00000000 -22.22334300  
C 0.00000000 0.00000000 -25.09174500  
C 0.00000000 -1.23099600 -24.37591200  
C 0.00000000 -1.23096700 -27.24288400  
C 0.00000000 0.00000000 -26.52752000  
C 0.00000000 0.00000000 -29.39837000  
C 0.00000000 -1.23128600 -28.68263400  
C 0.00000000 -1.23125000 -31.54897500  
C 0.00000000 0.00000000 -30.83380800  
C 0.00000000 0.00000000 -33.70776100  
C 0.00000000 -1.23163200 -32.99216300  
C 0.00000000 -1.23159200 -35.85771900  
C 0.00000000 0.00000000 -35.14277200  
C 0.00000000 0.00000000 -38.02050800  
C 0.00000000 -1.23200200 -37.30513100  
C 0.00000000 -1.23161200 -40.16990000  
C 0.00000000 0.00000000 -39.45498900  
C 0.00000000 0.00000000 -42.33940200  
C 0.00000000 -1.23211200 -41.62277700  
C 0.00000000 -1.23580700 -44.48578700  
C 0.00000000 0.00000000 -43.77422600  
C 0.00000000 0.00000000 -46.65107600  
C 0.00000000 -1.24140700 -45.94803200  
C 0.00000000 -1.22943500 -48.77799400  
C 0.00000000 0.00000000 -48.08036000  
C 0.00000000 -2.41723000 48.08701500  
C 0.00000000 -2.42145500 46.68647800  
C 0.00000000 -2.41603100 43.74557200  
C 0.00000000 -2.41656200 42.36160900  
C 0.00000000 -2.41804700 39.42824200  
C 0.00000000 -2.41939500 38.04878200  
C 0.00000000 -2.42133700 35.11363000  
C 0.00000000 -2.42233900 33.73769300  
C 0.00000000 -2.42383000 30.80293000

C 0.00000000 -2.42469300 29.42986500  
C 0.00000000 -2.42592300 26.49524200  
C 0.00000000 -2.42663100 25.12449300  
C 0.00000000 -2.42759700 22.18997900  
C 0.00000000 -2.42814700 20.82102000  
C 0.00000000 -2.42886500 17.88658200  
C 0.00000000 -2.42926800 16.51893700  
C 0.00000000 -2.42976900 13.58455000  
C 0.00000000 -2.43004500 12.21781900  
C 0.00000000 -2.43036900 9.28346700  
C 0.00000000 -2.43054000 7.91732300  
C 0.00000000 -2.43072000 4.98299300  
C 0.00000000 -2.43080200 3.61717700  
C 0.00000000 -2.43086000 0.68285600  
C 0.00000000 -2.43086000 -0.68285600  
C 0.00000000 -2.43080200 -3.61717700  
C 0.00000000 -2.43072000 -4.98299300  
C 0.00000000 -2.43054000 -7.91732300  
C 0.00000000 -2.43036900 -9.28346700  
C 0.00000000 -2.43004500 -12.21781900  
C 0.00000000 -2.42976900 -13.58455000  
C 0.00000000 -2.42926800 -16.51893700  
C 0.00000000 -2.42886500 -17.88658200  
C 0.00000000 -2.42814700 -20.82102000  
C 0.00000000 -2.42759700 -22.18997900  
C 0.00000000 -2.42663100 -25.12449300  
C 0.00000000 -2.42592300 -26.49524200  
C 0.00000000 -2.42469300 -29.42986500  
C 0.00000000 -2.42383000 -30.80293000  
C 0.00000000 -2.42233900 -33.73769300  
C 0.00000000 -2.42133700 -35.11363000  
C 0.00000000 -2.41939500 -38.04878200  
C 0.00000000 -2.41804700 -39.42824200  
C 0.00000000 -2.41656200 -42.36160900  
C 0.00000000 -2.41603100 -43.74557200  
C 0.00000000 -2.42145500 -46.68647800  
C 0.00000000 -2.41723000 -48.08701500  
H 0.00000000 -3.36295800 48.62193700  
H 0.00000000 -3.38164900 46.18296200  
H 0.00000000 -3.37641600 44.24867500  
H 0.00000000 -3.37674700 41.85867600  
H 0.00000000 -3.37762900 39.93244700  
H 0.00000000 -3.37949100 37.54579400  
H 0.00000000 -3.38035100 35.61877000  
H 0.00000000 -3.38174700 33.23354900  
H 0.00000000 -3.38241000 31.30873400



H 0.00000000 -3.38359800 28.92489500  
H 0.00000000 -3.38413600 27.00160200  
H 0.00000000 -3.38510600 24.61880400  
H 0.00000000 -3.38552300 22.69677200  
H 0.00000000 -3.38627500 20.31474500  
H 0.00000000 -3.38658000 18.39368500  
H 0.00000000 -3.38713100 16.01221200  
H 0.00000000 -3.38734200 14.09185900  
H 0.00000000 -3.38771800 11.71076700  
H 0.00000000 -3.38785300 9.79089800  
H 0.00000000 -3.38808500 7.41004900  
H 0.00000000 -3.38816000 5.49047900  
H 0.00000000 -3.38827200 3.10976700  
H 0.00000000 -3.38829100 1.19034400  
H 0.00000000 -3.38829100 -1.19034400  
H 0.00000000 -3.38827200 -3.10976700  
H 0.00000000 -3.38816000 -5.49047900  
H 0.00000000 -3.38808500 -7.41004900  
H 0.00000000 -3.38785300 -9.79089800  
H 0.00000000 -3.38771800 -11.71076700  
H 0.00000000 -3.38734200 -14.09185900  
H 0.00000000 -3.38713100 -16.01221200  
H 0.00000000 -3.38658000 -18.39368500  
H 0.00000000 -3.38627500 -20.31474500  
H 0.00000000 -3.38552300 -22.69677200  
H 0.00000000 -3.38510600 -24.61880400  
H 0.00000000 -3.38413600 -27.00160200  
H 0.00000000 -3.38359800 -28.92489500  
H 0.00000000 -3.38241000 -31.30873400  
H 0.00000000 -3.38174700 -33.23354900  
H 0.00000000 -3.38035100 -35.61877000  
H 0.00000000 -3.37949100 -37.54579400  
H 0.00000000 -3.37762900 -39.93244700  
H 0.00000000 -3.37674700 -41.85867600  
H 0.00000000 -3.37641600 -44.24867500  
H 0.00000000 -3.38164900 -46.18296200  
H 0.00000000 -3.36295800 -48.62193700  
H 0.00000000 3.36295800 48.62193700  
H 0.00000000 3.38164900 46.18296200  
H 0.00000000 3.37641600 44.24867500  
H 0.00000000 3.37674700 41.85867600  
H 0.00000000 3.37762900 39.93244700  
H 0.00000000 3.37949100 37.54579400  
H 0.00000000 3.38035100 35.61877000  
H 0.00000000 3.38174700 33.23354900  
H 0.00000000 3.38241000 31.30873400

H 0.00000000 3.38359800 28.92489500  
H 0.00000000 3.38413600 27.00160200  
H 0.00000000 3.38510600 24.61880400  
H 0.00000000 3.38552300 22.69677200  
H 0.00000000 3.38627500 20.31474500  
H 0.00000000 3.38658000 18.39368500  
H 0.00000000 3.38713100 16.01221200  
H 0.00000000 3.38734200 14.09185900  
H 0.00000000 3.38771800 11.71076700  
H 0.00000000 3.38785300 9.79089800  
H 0.00000000 3.38808500 7.41004900  
H 0.00000000 3.38816000 5.49047900  
H 0.00000000 3.38827200 3.10976700  
H 0.00000000 3.38829100 1.19034400  
H 0.00000000 3.38829100 -1.19034400  
H 0.00000000 3.38827200 -3.10976700  
H 0.00000000 3.38816000 -5.49047900  
H 0.00000000 3.38808500 -7.41004900  
H 0.00000000 3.38785300 -9.79089800  
H 0.00000000 3.38771800 -11.71076700  
H 0.00000000 3.38734200 -14.09185900  
H 0.00000000 3.38713100 -16.01221200  
H 0.00000000 3.38658000 -18.39368500  
H 0.00000000 3.38627500 -20.31474500  
H 0.00000000 3.38552300 -22.69677200  
H 0.00000000 3.38510600 -24.61880400  
H 0.00000000 3.38413600 -27.00160200  
H 0.00000000 3.38359800 -28.92489500  
H 0.00000000 3.38241000 -31.30873400  
H 0.00000000 3.38174700 -33.23354900  
H 0.00000000 3.38035100 -35.61877000  
H 0.00000000 3.37949100 -37.54579400  
H 0.00000000 3.37762900 -39.93244700  
H 0.00000000 3.37674700 -41.85867600  
H 0.00000000 3.37641600 -44.24867500  
H 0.00000000 3.38164900 -46.18296200  
H 0.00000000 3.36295800 -48.62193700  
H 0.00000000 1.21657800 49.86498400  
H 0.00000000 -1.21657800 49.86498400  
H 0.00000000 1.21657800 -49.86498400  
H 0.00000000 -1.21657800 -49.86498400

-----  
**2x23 open singlet**

C -48.04394300 2.41858800 0.00000000  
C -48.73516100 1.22942100 0.00000000

C -45.90488300 1.24123600 0.00000000  
C -46.64475400 2.42357600 0.00000000  
C -43.70409000 2.41993800 0.00000000  
C -44.44630100 1.23538500 0.00000000  
C -41.58226800 1.23168800 0.00000000  
C -42.32417200 2.42111700 0.00000000  
C -39.39101500 2.42363500 0.00000000  
C -40.13607400 1.23101900 0.00000000  
C -37.26982700 1.23135700 0.00000000  
C -38.01715200 2.42520000 0.00000000  
C -35.08241100 2.42737400 0.00000000  
C -35.83025800 1.23093100 0.00000000  
C -32.96315300 1.23094800 0.00000000  
C -33.71232100 2.42828200 0.00000000  
C -30.77789500 2.42949800 0.00000000  
C -31.52749400 1.23064500 0.00000000  
C -28.65973700 1.23065600 0.00000000  
C -29.41013700 2.43008600 0.00000000  
C -26.47583700 2.43083700 0.00000000  
C -27.22651000 1.23045800 0.00000000  
C -24.35836100 1.23047300 0.00000000  
C -25.10954100 2.43122500 0.00000000  
C -22.17531400 2.43169100 0.00000000  
C -22.92666600 1.23034200 0.00000000  
C -20.05827500 1.23035500 0.00000000  
C -20.80995000 2.43194900 0.00000000  
C -17.87577500 2.43224100 0.00000000  
C -18.62755900 1.23026800 0.00000000  
C -15.75901800 1.23027900 0.00000000  
C -16.51100800 2.43241200 0.00000000  
C -13.57686900 2.43259300 0.00000000  
C -14.32892800 1.23022200 0.00000000  
C -11.46029400 1.23023100 0.00000000  
C -12.21248200 2.43270400 0.00000000  
C -9.27836600 2.43281300 0.00000000  
C -10.03059700 1.23019600 0.00000000  
C -7.16190800 1.23020100 0.00000000  
C -7.91421300 2.43288000 0.00000000  
C -4.98011300 2.43293800 0.00000000  
C -5.73244100 1.23018200 0.00000000  
C -2.86372300 1.23018500 0.00000000  
C -3.61608500 2.43296900 0.00000000  
C -0.68199300 2.43298700 0.00000000  
C -1.43436300 1.23017900 0.00000000  
C 1.43436400 1.23017900 0.00000000  
C 0.68199400 2.43298700 0.00000000

C 3.61608600 2.43296900 0.00000000  
C 2.86372400 1.23018500 0.00000000  
C 5.73244200 1.23018200 0.00000000  
C 4.98011400 2.43293800 0.00000000  
C 7.91421400 2.43288000 0.00000000  
C 7.16190900 1.23020100 0.00000000  
C 10.03059800 1.23019600 0.00000000  
C 9.27836700 2.43281300 0.00000000  
C 12.21248300 2.43270400 0.00000000  
C 11.46029400 1.23023100 0.00000000  
C 14.32892900 1.23022200 0.00000000  
C 13.57686900 2.43259300 0.00000000  
C 16.51100900 2.43241200 0.00000000  
C 15.75901800 1.23027900 0.00000000  
C 18.62756000 1.23026800 0.00000000  
C 17.87577600 2.43224100 0.00000000  
C 20.80995000 2.43195000 0.00000000  
C 20.05827500 1.23035500 0.00000000  
C 22.92666600 1.23034200 0.00000000  
C 22.17531400 2.43169200 0.00000000  
C 25.10954100 2.43122500 0.00000000  
C 24.35836100 1.23047300 0.00000000  
C 27.22650900 1.23045800 0.00000000  
C 26.47583700 2.43083700 0.00000000  
C 29.41013700 2.43008600 0.00000000  
C 28.65973600 1.23065600 0.00000000  
C 31.52749400 1.23064500 0.00000000  
C 30.77789500 2.42949900 0.00000000  
C 33.71232000 2.42828200 0.00000000  
C 32.96315200 1.23094800 0.00000000  
C 35.83025700 1.23093100 0.00000000  
C 35.08241000 2.42737400 0.00000000  
C 38.01715200 2.42520000 0.00000000  
C 37.26982600 1.23135700 0.00000000  
C 40.13607300 1.23101900 0.00000000  
C 39.39101400 2.42363500 0.00000000  
C 42.32417100 2.42111700 0.00000000  
C 41.58226700 1.23168800 0.00000000  
C 44.44630000 1.23538500 0.00000100  
C 43.70409000 2.41993800 0.00000000  
C 46.64475300 2.42357600 0.00000100  
C 45.90488200 1.24123600 0.00000100  
C 48.73516000 1.22942100 0.00000100  
C 48.04394200 2.41858800 0.00000100  
C -48.03772300 0.00000000 0.00000000  
C -48.73516100 -1.22942200 0.00000100

C -45.90488300 -1.24123600 0.00000000  
C -46.60828900 0.00000000 0.00000000  
C -43.73468500 0.00000000 0.00000000  
C -44.44630100 -1.23538500 0.00000000  
C -41.58226800 -1.23168900 0.00000000  
C -42.29934500 0.00000000 0.00000000  
C -39.42084800 0.00000000 0.00000000  
C -40.13607400 -1.23101900 0.00000000  
C -37.26982700 -1.23135700 0.00000000  
C -37.98567800 0.00000000 0.00000000  
C -35.11483900 0.00000000 0.00000000  
C -35.83025800 -1.23093100 0.00000000  
C -32.96315300 -1.23094800 0.00000000  
C -33.67914400 0.00000000 0.00000000  
C -30.81181800 0.00000000 0.00000000  
C -31.52749400 -1.23064500 0.00000000  
C -28.65973700 -1.23065600 0.00000000  
C -29.37578600 0.00000000 0.00000000  
C -26.51067500 0.00000000 0.00000000  
C -27.22651000 -1.23045800 0.00000000  
C -24.35836100 -1.23047300 0.00000000  
C -25.07443400 0.00000000 0.00000000  
C -22.21073500 0.00000000 0.00000000  
C -22.92666600 -1.23034200 0.00000000  
C -20.05827500 -1.23035500 0.00000000  
C -20.77436000 0.00000000 0.00000000  
C -17.91156900 0.00000000 0.00000000  
C -18.62755900 -1.23026800 0.00000000  
C -15.75901800 -1.23027900 0.00000000  
C -16.47510700 0.00000000 0.00000000  
C -13.61290000 0.00000000 0.00000000  
C -14.32892800 -1.23022200 0.00000000  
C -11.46029400 -1.23023100 0.00000000  
C -12.17638400 0.00000000 0.00000000  
C -9.31454500 0.00000000 0.00000000  
C -10.03059700 -1.23019500 0.00000000  
C -7.16190800 -1.23020100 0.00000000  
C -7.87799600 0.00000000 0.00000000  
C -5.01637400 0.00000000 0.00000000  
C -5.73244100 -1.23018200 0.00000000  
C -2.86372300 -1.23018500 0.00000000  
C -3.57980700 0.00000000 0.00000000  
C -0.71828600 0.00000000 0.00000000  
C -1.43436300 -1.23017900 0.00000000  
C 1.43436400 -1.23017900 0.00000000  
C 0.71828700 0.00000000 0.00000000

C 3.57980800 0.00000000 0.00000000  
C 2.86372400 -1.23018500 0.00000000  
C 5.73244200 -1.23018200 0.00000000  
C 5.01637500 0.00000000 0.00000000  
C 7.87799700 0.00000000 0.00000000  
C 7.16190900 -1.23020100 0.00000000  
C 10.03059800 -1.23019500 0.00000000  
C 9.31454600 0.00000000 0.00000000  
C 12.17638400 0.00000000 0.00000000  
C 11.46029400 -1.23023100 0.00000000  
C 14.32892900 -1.23022200 0.00000000  
C 13.61290100 0.00000000 0.00000000  
C 16.47510800 0.00000000 0.00000000  
C 15.75901800 -1.23027900 0.00000000  
C 18.62756000 -1.23026800 0.00000000  
C 17.91156900 0.00000000 0.00000000  
C 20.77436000 0.00000000 0.00000000  
C 20.05827500 -1.23035500 0.00000000  
C 22.92666600 -1.23034200 0.00000000  
C 22.21073500 0.00000000 0.00000000  
C 25.07443400 0.00000000 0.00000000  
C 24.35836100 -1.23047300 0.00000000  
C 27.22650900 -1.23045800 0.00000000  
C 26.51067400 0.00000000 0.00000000  
C 29.37578500 0.00000000 0.00000000  
C 28.65973600 -1.23065600 0.00000000  
C 31.52749400 -1.23064500 0.00000000  
C 30.81181700 0.00000000 0.00000000  
C 33.67914300 0.00000000 0.00000000  
C 32.96315200 -1.23094800 0.00000000  
C 35.83025700 -1.23093100 0.00000000  
C 35.11483800 0.00000000 0.00000000  
C 37.98567700 0.00000000 0.00000000  
C 37.26982600 -1.23135700 0.00000000  
C 40.13607300 -1.23101900 0.00000000  
C 39.42084800 0.00000000 0.00000000  
C 42.29934500 0.00000000 0.00000000  
C 41.58226700 -1.23168900 0.00000000  
C 44.44630000 -1.23538500 0.00000100  
C 43.73468400 0.00000000 0.00000000  
C 46.60828800 0.00000000 0.00000100  
C 45.90488200 -1.24123600 0.00000100  
C 48.73516000 -1.22942200 0.00000100  
C 48.03772200 0.00000000 0.00000100  
C -48.04394300 -2.41858800 0.00000100  
C -46.64475400 -2.42357700 0.00000000

C -43.70409000 -2.41993800 0.00000000  
C -42.32417200 -2.42111700 0.00000000  
C -39.39101500 -2.42363500 0.00000000  
C -38.01715200 -2.42520000 0.00000000  
C -35.08241000 -2.42737400 0.00000000  
C -33.71232100 -2.42828200 0.00000000  
C -30.77789500 -2.42949800 0.00000000  
C -29.41013700 -2.43008600 0.00000000  
C -26.47583700 -2.43083700 0.00000000  
C -25.10954100 -2.43122500 0.00000000  
C -22.17531400 -2.43169100 0.00000000  
C -20.80995000 -2.43194900 0.00000000  
C -17.87577500 -2.43224100 0.00000000  
C -16.51100800 -2.43241200 0.00000000  
C -13.57686900 -2.43259300 0.00000000  
C -12.21248200 -2.43270400 0.00000000  
C -9.27836600 -2.43281300 0.00000000  
C -7.91421300 -2.43288000 0.00000000  
C -4.98011300 -2.43293800 0.00000000  
C -3.61608500 -2.43296900 0.00000000  
C -0.68199300 -2.43298700 0.00000000  
C 0.68199400 -2.43298700 0.00000000  
C 3.61608600 -2.43296900 0.00000000  
C 4.98011400 -2.43293800 0.00000000  
C 7.91421400 -2.43288000 0.00000000  
C 9.27836700 -2.43281300 0.00000000  
C 12.21248300 -2.43270400 0.00000000  
C 13.57686900 -2.43259300 0.00000000  
C 16.51100900 -2.43241200 0.00000000  
C 17.87577600 -2.43224100 0.00000000  
C 20.80995000 -2.43195000 0.00000000  
C 22.17531400 -2.43169200 0.00000000  
C 25.10954100 -2.43122500 0.00000000  
C 26.47583700 -2.43083700 0.00000000  
C 29.41013700 -2.43008600 0.00000000  
C 30.77789500 -2.42949900 0.00000000  
C 33.71232000 -2.42828200 0.00000000  
C 35.08241000 -2.42737400 0.00000000  
C 38.01715200 -2.42520000 0.00000000  
C 39.39101400 -2.42363500 0.00000000  
C 42.32417100 -2.42111700 0.00000000  
C 43.70409000 -2.41993800 0.00000000  
C 46.64475300 -2.42357700 0.00000100  
C 48.04394200 -2.41858800 0.00000100  
H -48.57972700 -3.36382700 0.00000100  
H -46.14103300 -3.38355800 0.00000000

H -44.20890900 -3.37933600 0.00000000  
H -41.82020600 -3.38058100 0.00000000  
H -39.89715700 -3.38203900 0.00000000  
H -37.51236100 -3.38417100 0.00000000  
H -35.58949300 -3.38518700 0.00000000  
H -33.20615900 -3.38645900 0.00000000  
H -31.28538600 -3.38701000 0.00000000  
H -28.90321500 -3.38782100 0.00000000  
H -26.98360700 -3.38814900 0.00000000  
H -24.60214500 -3.38868300 0.00000000  
H -22.68325700 -3.38887700 0.00000000  
H -20.30225400 -3.38923200 0.00000000  
H -18.38382400 -3.38934800 0.00000000  
H -16.00312400 -3.38958400 0.00000000  
H -14.08497900 -3.38965300 0.00000000  
H -11.70447800 -3.38980600 0.00000000  
H -9.78650900 -3.38984700 0.00000000  
H -7.40613400 -3.38993800 0.00000000  
H -5.48826700 -3.38995900 0.00000000  
H -3.10796100 -3.39000200 0.00000000  
H -1.19014100 -3.39000900 0.00000000  
H 1.19014200 -3.39000900 0.00000000  
H 3.10796200 -3.39000200 0.00000000  
H 5.48826800 -3.38995900 0.00000000  
H 7.40613400 -3.38993800 0.00000000  
H 9.78651000 -3.38984700 0.00000000  
H 11.70447800 -3.38980600 0.00000000  
H 14.08498000 -3.38965300 0.00000000  
H 16.00312400 -3.38958400 0.00000000  
H 18.38382500 -3.38934800 0.00000000  
H 20.30225400 -3.38923200 0.00000000  
H 22.68325700 -3.38887800 0.00000000  
H 24.60214500 -3.38868400 0.00000000  
H 26.98360600 -3.38814900 0.00000000  
H 28.90321500 -3.38782100 0.00000000  
H 31.28538600 -3.38701000 0.00000000  
H 33.20615900 -3.38645900 0.00000000  
H 35.58949300 -3.38518700 0.00000000  
H 37.51236000 -3.38417100 0.00000000  
H 39.89715600 -3.38203900 0.00000000  
H 41.82020500 -3.38058100 0.00000000  
H 44.20890800 -3.37933600 0.00000100  
H 46.14103300 -3.38355800 0.00000100  
H 48.57972700 -3.36382700 0.00000100  
H -48.57972800 3.36382700 0.00000000  
H -46.14103300 3.38355800 0.00000000



H -44.20890900 3.37933600 0.00000000  
H -41.82020600 3.38058100 0.00000000  
H -39.89715700 3.38203900 0.00000000  
H -37.51236100 3.38417100 0.00000000  
H -35.58949300 3.38518700 0.00000000  
H -33.20615900 3.38645900 0.00000000  
H -31.28538600 3.38701000 0.00000000  
H -28.90321500 3.38782100 0.00000000  
H -26.98360700 3.38814900 0.00000000  
H -24.60214500 3.38868300 0.00000000  
H -22.68325700 3.38887700 0.00000000  
H -20.30225400 3.38923200 0.00000000  
H -18.38382400 3.38934800 0.00000000  
H -16.00312400 3.38958400 0.00000000  
H -14.08497900 3.38965300 0.00000000  
H -11.70447800 3.38980600 0.00000000  
H -9.78650900 3.38984700 0.00000000  
H -7.40613400 3.38993800 0.00000000  
H -5.48826700 3.38996000 0.00000000  
H -3.10796100 3.39000200 0.00000000  
H -1.19014100 3.39000900 0.00000000  
H 1.19014200 3.39000900 0.00000000  
H 3.10796200 3.39000200 0.00000000  
H 5.48826800 3.38996000 0.00000000  
H 7.40613400 3.38993800 0.00000000  
H 9.78651000 3.38984700 0.00000000  
H 11.70447800 3.38980600 0.00000000  
H 14.08498000 3.38965400 0.00000000  
H 16.00312400 3.38958400 0.00000000  
H 18.38382500 3.38934800 0.00000000  
H 20.30225400 3.38923200 0.00000000  
H 22.68325700 3.38887800 0.00000000  
H 24.60214500 3.38868400 0.00000000  
H 26.98360600 3.38814900 0.00000000  
H 28.90321500 3.38782100 0.00000000  
H 31.28538600 3.38701000 0.00000000  
H 33.20615900 3.38645900 0.00000000  
H 35.58949300 3.38518700 0.00000000  
H 37.51236000 3.38417100 0.00000000  
H 39.89715600 3.38203900 0.00000000  
H 41.82020500 3.38058100 0.00000000  
H 44.20890800 3.37933600 0.00000100  
H 46.14103300 3.38355800 0.00000100  
H 48.57972700 3.36382700 0.00000100  
H -49.82216000 1.21666000 0.00000100  
H -49.82216000 -1.21666000 0.00000100

H 49.82215900 1.21666000 0.00000100  
H 49.82215900 -1.21666000 0.00000100

-----  
**Edge-modified closed singlet 2x23**

C 0.00000000 1.20423500 45.78330200  
C 0.00000000 2.44614300 43.64299600  
C 0.00000000 1.22532200 44.38201700  
C 0.00000000 1.23576500 41.52340200  
C 0.00000000 2.44743700 42.28372400  
C 0.00000000 2.43804400 39.34333900  
C 0.00000000 1.23258600 40.10011300  
C 0.00000000 1.22944600 37.23043800  
C 0.00000000 2.43646600 37.98298900  
C 0.00000000 2.43488700 35.05056800  
C 0.00000000 1.22953600 35.80468100  
C 0.00000000 1.22984900 32.93507900  
C 0.00000000 2.43490400 33.68894000  
C 0.00000000 2.43467800 30.75487300  
C 0.00000000 1.22987900 31.50855000  
C 0.00000000 1.22993500 28.63929500  
C 0.00000000 2.43468800 29.39283900  
C 0.00000000 2.43448800 26.45887600  
C 0.00000000 1.22991500 27.21240700  
C 0.00000000 1.22995100 24.34321200  
C 0.00000000 2.43452200 25.09666800  
C 0.00000000 2.43440400 22.16270500  
C 0.00000000 1.22993000 22.91616100  
C 0.00000000 1.22995800 20.04699700  
C 0.00000000 2.43444200 20.80041400  
C 0.00000000 2.43436700 17.86644900  
C 0.00000000 1.22993800 18.61986900  
C 0.00000000 1.22995900 15.75072100  
C 0.00000000 2.43440000 16.50411800  
C 0.00000000 2.43435100 13.57015300  
C 0.00000000 1.22994400 14.32355500  
C 0.00000000 1.22995800 11.45441400  
C 0.00000000 2.43437700 12.20780300  
C 0.00000000 2.43434600 9.27383700  
C 0.00000000 1.22994700 10.02723000  
C 0.00000000 1.22995600 7.15809300  
C 0.00000000 2.43436400 7.91147900  
C 0.00000000 2.43434600 4.97751100  
C 0.00000000 1.22995000 5.73090000  
C 0.00000000 1.22995400 2.86176400  
C 0.00000000 2.43435500 3.61514900

C 0.00000000 2.43435000 0.68118200  
C 0.00000000 1.22995200 1.43456800  
C 0.00000000 1.22995200 -1.43456800  
C 0.00000000 2.43435000 -0.68118200  
C 0.00000000 2.43435500 -3.61514900  
C 0.00000000 1.22995400 -2.86176400  
C 0.00000000 1.22995000 -5.73090000  
C 0.00000000 2.43434600 -4.97751100  
C 0.00000000 2.43436400 -7.91147900  
C 0.00000000 1.22995600 -7.15809300  
C 0.00000000 1.22994700 -10.02723000  
C 0.00000000 2.43434600 -9.27383700  
C 0.00000000 2.43437700 -12.20780300  
C 0.00000000 1.22995800 -11.45441400  
C 0.00000000 1.22994400 -14.32355500  
C 0.00000000 2.43435100 -13.57015300  
C 0.00000000 2.43440000 -16.50411800  
C 0.00000000 1.22995900 -15.75072100  
C 0.00000000 1.22993800 -18.61986900  
C 0.00000000 2.43436700 -17.86644900  
C 0.00000000 2.43444200 -20.80041400  
C 0.00000000 1.22995800 -20.04699700  
C 0.00000000 1.22993000 -22.91616100  
C 0.00000000 2.43440400 -22.16270500  
C 0.00000000 2.43452200 -25.09666800  
C 0.00000000 1.22995100 -24.34321200  
C 0.00000000 1.22991500 -27.21240700  
C 0.00000000 2.43448800 -26.45887600  
C 0.00000000 2.43468800 -29.39283900  
C 0.00000000 1.22993500 -28.63929500  
C 0.00000000 1.22987900 -31.50855000  
C 0.00000000 2.43467800 -30.75487300  
C 0.00000000 2.43490400 -33.68894000  
C 0.00000000 1.22984900 -32.93507900  
C 0.00000000 1.22953600 -35.80468100  
C 0.00000000 2.43488700 -35.05056800  
C 0.00000000 2.43646600 -37.98298900  
C 0.00000000 1.22944600 -37.23043800  
C 0.00000000 1.23258600 -40.10011300  
C 0.00000000 2.43804400 -39.34333900  
C 0.00000000 2.44743700 -42.28372400  
C 0.00000000 1.23576500 -41.52340200  
C 0.00000000 1.22532200 -44.38201700  
C 0.00000000 2.44614300 -43.64299600  
C 0.00000000 1.20423500 -45.78330200  
C 0.00000000 -1.20423500 45.78330200

C 0.00000000 0.00000000 46.47597800  
C 0.00000000 0.00000000 43.66012200  
C 0.00000000 -1.22532200 44.38201700  
C 0.00000000 -1.23576500 41.52340200  
C 0.00000000 0.00000000 42.23057500  
C 0.00000000 0.00000000 39.38549200  
C 0.00000000 -1.23258600 40.10011300  
C 0.00000000 -1.22944600 37.23043800  
C 0.00000000 0.00000000 37.94776700  
C 0.00000000 0.00000000 35.08815800  
C 0.00000000 -1.22953600 35.80468100  
C 0.00000000 -1.22984900 32.93507900  
C 0.00000000 0.00000000 33.65125900  
C 0.00000000 0.00000000 30.79233500  
C 0.00000000 -1.22987900 31.50855000  
C 0.00000000 -1.22993500 28.63929500  
C 0.00000000 0.00000000 29.35547500  
C 0.00000000 0.00000000 26.49623600  
C 0.00000000 -1.22991500 27.21240700  
C 0.00000000 -1.22995100 24.34321200  
C 0.00000000 0.00000000 25.05938900  
C 0.00000000 0.00000000 22.20000500  
C 0.00000000 -1.22993000 22.91616100  
C 0.00000000 -1.22995800 20.04699700  
C 0.00000000 0.00000000 20.76316600  
C 0.00000000 0.00000000 17.90371800  
C 0.00000000 -1.22993800 18.61986900  
C 0.00000000 -1.22995900 15.75072100  
C 0.00000000 0.00000000 16.46688500  
C 0.00000000 0.00000000 13.60740600  
C 0.00000000 -1.22994400 14.32355500  
C 0.00000000 -1.22995800 11.45441400  
C 0.00000000 0.00000000 12.17057400  
C 0.00000000 0.00000000 9.31108000  
C 0.00000000 -1.22994700 10.02723000  
C 0.00000000 -1.22995600 7.15809300  
C 0.00000000 0.00000000 7.87425000  
C 0.00000000 0.00000000 5.01474900  
C 0.00000000 -1.22995000 5.73090000  
C 0.00000000 -1.22995400 2.86176400  
C 0.00000000 0.00000000 3.57791900  
C 0.00000000 0.00000000 0.71841500  
C 0.00000000 -1.22995200 1.43456800  
C 0.00000000 -1.22995200 -1.43456800  
C 0.00000000 0.00000000 -0.71841500  
C 0.00000000 0.00000000 -3.57791900

C 0.00000000 -1.22995400 -2.86176400  
C 0.00000000 -1.22995000 -5.73090000  
C 0.00000000 0.00000000 -5.01474900  
C 0.00000000 0.00000000 -7.87425000  
C 0.00000000 -1.22995600 -7.15809300  
C 0.00000000 -1.22994700 -10.02723000  
C 0.00000000 0.00000000 -9.31108000  
C 0.00000000 0.00000000 -12.17057400  
C 0.00000000 -1.22995800 -11.45441400  
C 0.00000000 -1.22994400 -14.32355500  
C 0.00000000 0.00000000 -13.60740600  
C 0.00000000 0.00000000 -16.46688500  
C 0.00000000 -1.22995900 -15.75072100  
C 0.00000000 -1.22993800 -18.61986900  
C 0.00000000 0.00000000 -17.90371800  
C 0.00000000 0.00000000 -20.76316600  
C 0.00000000 -1.22995800 -20.04699700  
C 0.00000000 -1.22993000 -22.91616100  
C 0.00000000 0.00000000 -22.20000500  
C 0.00000000 0.00000000 -25.05938900  
C 0.00000000 -1.22995100 -24.34321200  
C 0.00000000 -1.22991500 -27.21240700  
C 0.00000000 0.00000000 -26.49623600  
C 0.00000000 0.00000000 -29.35547500  
C 0.00000000 -1.22993500 -28.63929500  
C 0.00000000 -1.22987900 -31.50855000  
C 0.00000000 0.00000000 -30.79233500  
C 0.00000000 0.00000000 -33.65125900  
C 0.00000000 -1.22984900 -32.93507900  
C 0.00000000 -1.22953600 -35.80468100  
C 0.00000000 0.00000000 -35.08815800  
C 0.00000000 0.00000000 -37.94776700  
C 0.00000000 -1.22944600 -37.23043800  
C 0.00000000 -1.23258600 -40.10011300  
C 0.00000000 0.00000000 -39.38549200  
C 0.00000000 0.00000000 -42.23057500  
C 0.00000000 -1.23576500 -41.52340200  
C 0.00000000 -1.22532200 -44.38201700  
C 0.00000000 0.00000000 -43.66012200  
C 0.00000000 0.00000000 -46.47597800  
C 0.00000000 -1.20423500 -45.78330200  
C 0.00000000 -2.44614300 43.64299600  
C 0.00000000 -2.44743700 42.28372400  
C 0.00000000 -2.43804400 39.34333900  
C 0.00000000 -2.43646600 37.98298900  
C 0.00000000 -2.43488700 35.05056800

C 0.00000000 -2.43490400 33.68894000  
C 0.00000000 -2.43467800 30.75487300  
C 0.00000000 -2.43468800 29.39283900  
C 0.00000000 -2.43448800 26.45887600  
C 0.00000000 -2.43452200 25.09666800  
C 0.00000000 -2.43440400 22.16270500  
C 0.00000000 -2.43444200 20.80041400  
C 0.00000000 -2.43436700 17.86644900  
C 0.00000000 -2.43440000 16.50411800  
C 0.00000000 -2.43435100 13.57015300  
C 0.00000000 -2.43437700 12.20780300  
C 0.00000000 -2.43434600 9.27383700  
C 0.00000000 -2.43436400 7.91147900  
C 0.00000000 -2.43434600 4.97751100  
C 0.00000000 -2.43435500 3.61514900  
C 0.00000000 -2.43435000 0.68118200  
C 0.00000000 -2.43435000 -0.68118200  
C 0.00000000 -2.43435500 -3.61514900  
C 0.00000000 -2.43434600 -4.97751100  
C 0.00000000 -2.43436400 -7.91147900  
C 0.00000000 -2.43434600 -9.27383700  
C 0.00000000 -2.43437700 -12.20780300  
C 0.00000000 -2.43435100 -13.57015300  
C 0.00000000 -2.43440000 -16.50411800  
C 0.00000000 -2.43436700 -17.86644900  
C 0.00000000 -2.43444200 -20.80041400  
C 0.00000000 -2.43440400 -22.16270500  
C 0.00000000 -2.43452200 -25.09666800  
C 0.00000000 -2.43448800 -26.45887600  
C 0.00000000 -2.43468800 -29.39283900  
C 0.00000000 -2.43467800 -30.75487300  
C 0.00000000 -2.43490400 -33.68894000  
C 0.00000000 -2.43488700 -35.05056800  
C 0.00000000 -2.43646600 -37.98298900  
C 0.00000000 -2.43804400 -39.34333900  
C 0.00000000 -2.44743700 -42.28372400  
C 0.00000000 -2.44614300 -43.64299600  
H 0.00000000 -3.38567000 44.19035200  
H 0.00000000 -3.40211800 41.77094600  
H 0.00000000 -3.39470200 39.85207800  
H 0.00000000 -3.39222800 37.47261500  
H 0.00000000 -3.39159800 35.55914700  
H 0.00000000 -3.39155800 33.18016400  
H 0.00000000 -3.39136100 31.26359300  
H 0.00000000 -3.39137400 28.88412600  
H 0.00000000 -3.39120800 26.96753100

H 0.00000000 -3.39125100 24.58803200  
H 0.00000000 -3.39114000 22.67133200  
H 0.00000000 -3.39118800 20.29181000  
H 0.00000000 -3.39111100 18.37506200  
H 0.00000000 -3.39115400 15.99552800  
H 0.00000000 -3.39110000 14.07875700  
H 0.00000000 -3.39113300 11.69921800  
H 0.00000000 -3.39109700 9.78243500  
H 0.00000000 -3.39112000 7.40289300  
H 0.00000000 -3.39109900 5.48610500  
H 0.00000000 -3.39111100 3.10656200  
H 0.00000000 -3.39110400 1.18977200  
H 0.00000000 -3.39110400 -1.18977200  
H 0.00000000 -3.39111100 -3.10656200  
H 0.00000000 -3.39109900 -5.48610500  
H 0.00000000 -3.39112000 -7.40289300  
H 0.00000000 -3.39109700 -9.78243500  
H 0.00000000 -3.39113300 -11.69921800  
H 0.00000000 -3.39110000 -14.07875700  
H 0.00000000 -3.39115400 -15.99552800  
H 0.00000000 -3.39111100 -18.37506200  
H 0.00000000 -3.39118800 -20.29181000  
H 0.00000000 -3.39114000 -22.67133200  
H 0.00000000 -3.39125100 -24.58803200  
H 0.00000000 -3.39120800 -26.96753100  
H 0.00000000 -3.39137400 -28.88412600  
H 0.00000000 -3.39136100 -31.26359300  
H 0.00000000 -3.39155800 -33.18016400  
H 0.00000000 -3.39159800 -35.55914700  
H 0.00000000 -3.39222800 -37.47261500  
H 0.00000000 -3.39470200 -39.85207800  
H 0.00000000 -3.40211800 -41.77094600  
H 0.00000000 -3.38567000 -44.19035200  
H 0.00000000 3.38567000 44.19035200  
H 0.00000000 3.40211800 41.77094600  
H 0.00000000 3.39470200 39.85207800  
H 0.00000000 3.39222800 37.47261500  
H 0.00000000 3.39159800 35.55914700  
H 0.00000000 3.39155800 33.18016400  
H 0.00000000 3.39136100 31.26359300  
H 0.00000000 3.39137400 28.88412600  
H 0.00000000 3.39120800 26.96753100  
H 0.00000000 3.39125100 24.58803200  
H 0.00000000 3.39114000 22.67133200  
H 0.00000000 3.39118800 20.29181000  
H 0.00000000 3.39111100 18.37506200

H 0.00000000 3.39115400 15.99552800  
H 0.00000000 3.39110000 14.07875700  
H 0.00000000 3.39113300 11.69921800  
H 0.00000000 3.39109700 9.78243500  
H 0.00000000 3.39112000 7.40289300  
H 0.00000000 3.39109900 5.48610500  
H 0.00000000 3.39111100 3.10656200  
H 0.00000000 3.39110400 1.18977200  
H 0.00000000 3.39110400 -1.18977200  
H 0.00000000 3.39111100 -3.10656200  
H 0.00000000 3.39109900 -5.48610500  
H 0.00000000 3.39112000 -7.40289300  
H 0.00000000 3.39109700 -9.78243500  
H 0.00000000 3.39113300 -11.69921800  
H 0.00000000 3.39110000 -14.07875700  
H 0.00000000 3.39115400 -15.99552800  
H 0.00000000 3.39111100 -18.37506200  
H 0.00000000 3.39118800 -20.29181000  
H 0.00000000 3.39114000 -22.67133200  
H 0.00000000 3.39125100 -24.58803200  
H 0.00000000 3.39120800 -26.96753100  
H 0.00000000 3.39137400 -28.88412600  
H 0.00000000 3.39136100 -31.26359300  
H 0.00000000 3.39155800 -33.18016400  
H 0.00000000 3.39159800 -35.55914700  
H 0.00000000 3.39222800 -37.47261500  
H 0.00000000 3.39470200 -39.85207800  
H 0.00000000 3.40211800 -41.77094600  
H 0.00000000 3.38567000 -44.19035200  
H 0.00000000 2.14753100 -46.32409200  
H 0.00000000 0.00000000 -47.56248000  
H 0.00000000 -2.14753100 -46.32409200  
H 0.00000000 2.14753100 46.32409200  
H 0.00000000 0.00000000 47.56248000  
H 0.00000000 -2.14753100 46.32409200

-----



## §S5 Cartesian coordinates of key 3x (7-AGNRs)

### 3x6 AGNR Closed Singlet

C 0.00000000 3.64294200 11.45432700  
C 0.00000000 2.45005000 12.14130200  
C 0.00000000 2.47081600 9.31146000  
C 0.00000000 3.65629800 10.05762100  
C 0.00000000 3.65719300 7.11969000  
C 0.00000000 2.46326100 7.86114000  
C 0.00000000 2.45808500 5.00968600  
C 0.00000000 3.65732800 5.74934400  
C 0.00000000 3.65721100 2.82743800  
C 0.00000000 2.45677200 3.56899600  
C 0.00000000 2.45611700 0.71975900  
C 0.00000000 3.65736000 1.46081300  
C 0.00000000 3.65736000 -1.46081300  
C 0.00000000 2.45611700 -0.71975900  
C 0.00000000 2.45677200 -3.56899600  
C 0.00000000 3.65721100 -2.82743800  
C 0.00000000 3.65732800 -5.74934400  
C 0.00000000 2.45808500 -5.00968600  
C 0.00000000 2.46326100 -7.86114000  
C 0.00000000 3.65719300 -7.11969000  
C 0.00000000 3.65629800 -10.05762100  
C 0.00000000 2.47081600 -9.31146000  
C 0.00000000 2.45005000 -12.14130200  
C 0.00000000 3.64294200 -11.45432700  
C 0.00000000 1.22142300 11.43933800  
C 0.00000000 0.00000000 12.11944000  
C 0.00000000 0.00000000 9.29026500  
C 0.00000000 1.22967600 10.00430500  
C 0.00000000 1.23386300 7.15238800  
C 0.00000000 0.00000000 7.86385200  
C 0.00000000 0.00000000 5.00019300  
C 0.00000000 1.23316600 5.71918100  
C 0.00000000 1.23224100 2.86124800  
C 0.00000000 0.00000000 3.58159100  
C 0.00000000 0.00000000 0.70830700  
C 0.00000000 1.23233900 1.42867100  
C 0.00000000 1.23233900 -1.42867100  
C 0.00000000 0.00000000 -0.70830700  
C 0.00000000 0.00000000 -3.58159100  
C 0.00000000 1.23224100 -2.86124800  
C 0.00000000 1.23316600 -5.71918100  
C 0.00000000 0.00000000 -5.00019300

C 0.00000000 0.00000000 -7.86385200  
C 0.00000000 1.23386300 -7.15238800  
C 0.00000000 1.22967600 -10.00430500  
C 0.00000000 0.00000000 -9.29026500  
C 0.00000000 0.00000000 -12.11944000  
C 0.00000000 1.22142300 -11.43933800  
C 0.00000000 -1.22142300 11.43933800  
C 0.00000000 -2.45005000 12.14130200  
C 0.00000000 -2.47081600 9.31146000  
C 0.00000000 -1.22967600 10.00430500  
C 0.00000000 -1.23386300 7.15238800  
C 0.00000000 -2.46326100 7.86114000  
C 0.00000000 -2.45808500 5.00968600  
C 0.00000000 -1.23316600 5.71918100  
C 0.00000000 -1.23224100 2.86124800  
C 0.00000000 -2.45677200 3.56899600  
C 0.00000000 -2.45611700 0.71975900  
C 0.00000000 -1.23233900 1.42867100  
C 0.00000000 -1.23233900 -1.42867100  
C 0.00000000 -2.45611700 -0.71975900  
C 0.00000000 -2.45677200 -3.56899600  
C 0.00000000 -1.23224100 -2.86124800  
C 0.00000000 -1.23316600 -5.71918100  
C 0.00000000 -2.45808500 -5.00968600  
C 0.00000000 -2.46326100 -7.86114000  
C 0.00000000 -1.23386300 -7.15238800  
C 0.00000000 -1.22967600 -10.00430500  
C 0.00000000 -2.47081600 -9.31146000  
C 0.00000000 -2.45005000 -12.14130200  
C 0.00000000 -1.22142300 -11.43933800  
C 0.00000000 -3.64294200 11.45432700  
C 0.00000000 -3.65629800 10.05762100  
C 0.00000000 -3.65719300 7.11969000  
C 0.00000000 -3.65732800 5.74934400  
C 0.00000000 -3.65721100 2.82743800  
C 0.00000000 -3.65736000 1.46081300  
C 0.00000000 -3.65736000 -1.46081300  
C 0.00000000 -3.65721100 -2.82743800  
C 0.00000000 -3.65732800 -5.74934400  
C 0.00000000 -3.65719300 -7.11969000  
C 0.00000000 -3.65629800 -10.05762100  
C 0.00000000 -3.64294200 -11.45432700  
H 0.00000000 -4.58481300 -11.99598000  
H 0.00000000 -4.61761000 -9.55739600  
H 0.00000000 -4.61376000 -7.62920700  
H 0.00000000 -4.61386600 -5.24096000

H 0.00000000 -4.61345800 -3.33648200  
H 0.00000000 -4.61352600 -0.95167000  
H 0.00000000 -4.61352600 0.95167000  
H 0.00000000 -4.61345800 3.33648200  
H 0.00000000 -4.61386600 5.24096000  
H 0.00000000 -4.61376000 7.62920700  
H 0.00000000 -4.61761000 9.55739600  
H 0.00000000 -4.58481300 11.99598000  
H 0.00000000 4.58481300 -11.99598000  
H 0.00000000 4.61761000 -9.55739600  
H 0.00000000 4.61376000 -7.62920700  
H 0.00000000 4.61386600 -5.24096000  
H 0.00000000 4.61345800 -3.33648200  
H 0.00000000 4.61352600 -0.95167000  
H 0.00000000 4.61352600 0.95167000  
H 0.00000000 4.61345800 3.33648200  
H 0.00000000 4.61386600 5.24096000  
H 0.00000000 4.61376000 7.62920700  
H 0.00000000 4.61761000 9.55739600  
H 0.00000000 4.58481300 11.99598000  
H 0.00000000 2.43226200 -13.22810300  
H 0.00000000 0.00000000 -13.20724300  
H 0.00000000 -2.43226200 -13.22810300  
H 0.00000000 2.43226200 13.22810300  
H 0.00000000 0.00000000 13.20724300  
H 0.00000000 -2.43226200 13.22810300

---

### **3x6 open singlet**

C 0.00000000 3.64975900 11.44029300  
C 0.00000000 2.45053300 12.12850400  
C 0.00000000 2.47046800 9.30099500  
C 0.00000000 3.66372400 10.04946000  
C 0.00000000 3.66312100 7.11231300  
C 0.00000000 2.46344900 7.85537500  
C 0.00000000 2.45832200 5.00550200  
C 0.00000000 3.66224000 5.74604100  
C 0.00000000 3.66069800 2.82483700  
C 0.00000000 2.45702500 3.56718700  
C 0.00000000 2.45631300 0.71891500  
C 0.00000000 3.66057900 1.46054400  
C 0.00000000 3.66057900 -1.46054400  
C 0.00000000 2.45631300 -0.71891500  
C 0.00000000 2.45702500 -3.56718700  
C 0.00000000 3.66069800 -2.82483700  
C 0.00000000 3.66224000 -5.74604100

C 0.00000000 2.45832200 -5.00550200  
C 0.00000000 2.46344900 -7.85537500  
C 0.00000000 3.66312100 -7.11231300  
C 0.00000000 3.66372400 -10.04946000  
C 0.00000000 2.47046800 -9.30099500  
C 0.00000000 2.45053300 -12.12850400  
C 0.00000000 3.64975900 -11.44029300  
C 0.00000000 1.22620800 11.42753200  
C 0.00000000 0.00000000 12.10953600  
C 0.00000000 0.00000000 9.27833300  
C 0.00000000 1.23398200 9.99406300  
C 0.00000000 1.23733400 7.14704800  
C 0.00000000 0.00000000 7.86079600  
C 0.00000000 0.00000000 4.99511200  
C 0.00000000 1.23580500 5.71477800  
C 0.00000000 1.23416000 2.85973500  
C 0.00000000 0.00000000 3.58109100  
C 0.00000000 0.00000000 0.70666100  
C 0.00000000 1.23406200 1.42763100  
C 0.00000000 1.23406200 -1.42763100  
C 0.00000000 0.00000000 -0.70666100  
C 0.00000000 0.00000000 -3.58109100  
C 0.00000000 1.23416000 -2.85973500  
C 0.00000000 1.23580500 -5.71477800  
C 0.00000000 0.00000000 -4.99511200  
C 0.00000000 0.00000000 -7.86079600  
C 0.00000000 1.23733400 -7.14704800  
C 0.00000000 1.23398200 -9.99406300  
C 0.00000000 0.00000000 -9.27833300  
C 0.00000000 0.00000000 -12.10953600  
C 0.00000000 1.22620800 -11.42753200  
C 0.00000000 -1.22620800 11.42753200  
C 0.00000000 -2.45053300 12.12850400  
C 0.00000000 -2.47046800 9.30099500  
C 0.00000000 -1.23398200 9.99406300  
C 0.00000000 -1.23733400 7.14704800  
C 0.00000000 -2.46344900 7.85537500  
C 0.00000000 -2.45832200 5.00550200  
C 0.00000000 -1.23580500 5.71477800  
C 0.00000000 -1.23416000 2.85973500  
C 0.00000000 -2.45702500 3.56718700  
C 0.00000000 -2.45631300 0.71891500  
C 0.00000000 -1.23406200 1.42763100  
C 0.00000000 -1.23406200 -1.42763100  
C 0.00000000 -2.45631300 -0.71891500  
C 0.00000000 -2.45702500 -3.56718700

C 0.00000000 -1.23416000 -2.85973500  
C 0.00000000 -1.23580500 -5.71477800  
C 0.00000000 -2.45832200 -5.00550200  
C 0.00000000 -2.46344900 -7.85537500  
C 0.00000000 -1.23733400 -7.14704800  
C 0.00000000 -1.23398200 -9.99406300  
C 0.00000000 -2.47046800 -9.30099500  
C 0.00000000 -2.45053300 -12.12850400  
C 0.00000000 -1.22620800 -11.42753200  
C 0.00000000 -3.64975900 11.44029300  
C 0.00000000 -3.66372400 10.04946000  
C 0.00000000 -3.66312100 7.11231300  
C 0.00000000 -3.66224000 5.74604100  
C 0.00000000 -3.66069800 2.82483700  
C 0.00000000 -3.66057900 1.46054400  
C 0.00000000 -3.66057900 -1.46054400  
C 0.00000000 -3.66069800 -2.82483700  
C 0.00000000 -3.66224000 -5.74604100  
C 0.00000000 -3.66312100 -7.11231300  
C 0.00000000 -3.66372400 -10.04946000  
C 0.00000000 -3.64975900 -11.44029300  
H 0.00000000 -4.59029000 -11.98428100  
H 0.00000000 -4.62381300 -9.54712900  
H 0.00000000 -4.61881000 -7.62313900  
H 0.00000000 -4.61761200 -5.23552000  
H 0.00000000 -4.61635300 -3.33484600  
H 0.00000000 -4.61608400 -0.95027500  
H 0.00000000 -4.61608400 0.95027500  
H 0.00000000 -4.61635300 3.33484600  
H 0.00000000 -4.61761200 5.23552000  
H 0.00000000 -4.61881000 7.62313900  
H 0.00000000 -4.62381300 9.54712900  
H 0.00000000 -4.59029000 11.98428100  
H 0.00000000 4.59029000 -11.98428100  
H 0.00000000 4.62381300 -9.54712900  
H 0.00000000 4.61881000 -7.62313900  
H 0.00000000 4.61761200 -5.23552000  
H 0.00000000 4.61635300 -3.33484600  
H 0.00000000 4.61608400 -0.95027500  
H 0.00000000 4.61608400 0.95027500  
H 0.00000000 4.61635300 3.33484600  
H 0.00000000 4.61761200 5.23552000  
H 0.00000000 4.61881000 7.62313900  
H 0.00000000 4.62381300 9.54712900  
H 0.00000000 4.59029000 11.98428100  
H 0.00000000 2.43326400 -13.21530400

H 0.00000000 0.00000000 -13.19714800  
H 0.00000000 -2.43326400 -13.21530400  
H 0.00000000 2.43326400 13.21530400  
H 0.00000000 0.00000000 13.19714800  
H 0.00000000 -2.43326400 13.21530400

---

### 3x6 Triplet

C 0.00000000 3.64975900 11.44029300  
C 0.00000000 2.45053300 12.12850400  
C 0.00000000 2.47046800 9.30099500  
C 0.00000000 3.66372400 10.04946000  
C 0.00000000 3.66312100 7.11231300  
C 0.00000000 2.46344900 7.85537500  
C 0.00000000 2.45832200 5.00550200  
C 0.00000000 3.66224000 5.74604100  
C 0.00000000 3.66069800 2.82483700  
C 0.00000000 2.45702500 3.56718700  
C 0.00000000 2.45631300 0.71891500  
C 0.00000000 3.66057900 1.46054400  
C 0.00000000 3.66057900 -1.46054400  
C 0.00000000 2.45631300 -0.71891500  
C 0.00000000 2.45702500 -3.56718700  
C 0.00000000 3.66069800 -2.82483700  
C 0.00000000 3.66224000 -5.74604100  
C 0.00000000 2.45832200 -5.00550200  
C 0.00000000 2.46344900 -7.85537500  
C 0.00000000 3.66312100 -7.11231300  
C 0.00000000 3.66372400 -10.04946000  
C 0.00000000 2.47046800 -9.30099500  
C 0.00000000 2.45053300 -12.12850400  
C 0.00000000 3.64975900 -11.44029300  
C 0.00000000 1.22620800 11.42753200  
C 0.00000000 0.00000000 12.10953600  
C 0.00000000 0.00000000 9.27833300  
C 0.00000000 1.23398200 9.99406300  
C 0.00000000 1.23733400 7.14704800  
C 0.00000000 0.00000000 7.86079600  
C 0.00000000 0.00000000 4.99511200  
C 0.00000000 1.23580500 5.71477800  
C 0.00000000 1.23416000 2.85973500  
C 0.00000000 0.00000000 3.58109100  
C 0.00000000 0.00000000 0.70666100  
C 0.00000000 1.23406200 1.42763100  
C 0.00000000 1.23406200 -1.42763100  
C 0.00000000 0.00000000 -0.70666100

C 0.00000000 0.00000000 -3.58109100  
C 0.00000000 1.23416000 -2.85973500  
C 0.00000000 1.23580500 -5.71477800  
C 0.00000000 0.00000000 -4.99511200  
C 0.00000000 0.00000000 -7.86079600  
C 0.00000000 1.23733400 -7.14704800  
C 0.00000000 1.23398200 -9.99406300  
C 0.00000000 0.00000000 -9.27833300  
C 0.00000000 0.00000000 -12.10953600  
C 0.00000000 1.22620800 -11.42753200  
C 0.00000000 -1.22620800 11.42753200  
C 0.00000000 -2.45053300 12.12850400  
C 0.00000000 -2.47046800 9.30099500  
C 0.00000000 -1.23398200 9.99406300  
C 0.00000000 -1.23733400 7.14704800  
C 0.00000000 -2.46344900 7.85537500  
C 0.00000000 -2.45832200 5.00550200  
C 0.00000000 -1.23580500 5.71477800  
C 0.00000000 -1.23416000 2.85973500  
C 0.00000000 -2.45702500 3.56718700  
C 0.00000000 -2.45631300 0.71891500  
C 0.00000000 -1.23406200 1.42763100  
C 0.00000000 -1.23406200 -1.42763100  
C 0.00000000 -2.45631300 -0.71891500  
C 0.00000000 -2.45702500 -3.56718700  
C 0.00000000 -1.23416000 -2.85973500  
C 0.00000000 -1.23580500 -5.71477800  
C 0.00000000 -2.45832200 -5.00550200  
C 0.00000000 -2.46344900 -7.85537500  
C 0.00000000 -1.23733400 -7.14704800  
C 0.00000000 -1.23398200 -9.99406300  
C 0.00000000 -2.47046800 -9.30099500  
C 0.00000000 -2.45053300 -12.12850400  
C 0.00000000 -1.22620800 -11.42753200  
C 0.00000000 -3.64975900 11.44029300  
C 0.00000000 -3.66372400 10.04946000  
C 0.00000000 -3.66312100 7.11231300  
C 0.00000000 -3.66224000 5.74604100  
C 0.00000000 -3.66069800 2.82483700  
C 0.00000000 -3.66057900 1.46054400  
C 0.00000000 -3.66057900 -1.46054400  
C 0.00000000 -3.66069800 -2.82483700  
C 0.00000000 -3.66224000 -5.74604100  
C 0.00000000 -3.66312100 -7.11231300  
C 0.00000000 -3.66372400 -10.04946000  
C 0.00000000 -3.64975900 -11.44029300

H 0.00000000 -4.59029000 -11.98428100  
H 0.00000000 -4.62381300 -9.54712900  
H 0.00000000 -4.61881000 -7.62313900  
H 0.00000000 -4.61761200 -5.23552000  
H 0.00000000 -4.61635300 -3.33484600  
H 0.00000000 -4.61608400 -0.95027500  
H 0.00000000 -4.61608400 0.95027500  
H 0.00000000 -4.61635300 3.33484600  
H 0.00000000 -4.61761200 5.23552000  
H 0.00000000 -4.61881000 7.62313900  
H 0.00000000 -4.62381300 9.54712900  
H 0.00000000 -4.59029000 11.98428100  
H 0.00000000 4.59029000 -11.98428100  
H 0.00000000 4.62381300 -9.54712900  
H 0.00000000 4.61881000 -7.62313900  
H 0.00000000 4.61761200 -5.23552000  
H 0.00000000 4.61635300 -3.33484600  
H 0.00000000 4.61608400 -0.95027500  
H 0.00000000 4.61608400 0.95027500  
H 0.00000000 4.61635300 3.33484600  
H 0.00000000 4.61761200 5.23552000  
H 0.00000000 4.61881000 7.62313900  
H 0.00000000 4.62381300 9.54712900  
H 0.00000000 4.59029000 11.98428100  
H 0.00000000 2.43326400 -13.21530400  
H 0.00000000 0.00000000 -13.19714800  
H 0.00000000 -2.43326400 -13.21530400  
H 0.00000000 2.43326400 13.21530400  
H 0.00000000 0.00000000 13.19714800  
H 0.00000000 -2.43326400 13.21530400

-----  
**Edge-modified 3x6**

C 0.00000000 3.64294200 11.45432700  
C 0.00000000 2.45005000 12.14130200  
C 0.00000000 2.47081600 9.31146000  
C 0.00000000 3.65629800 10.05762100  
C 0.00000000 3.65719300 7.11969000  
C 0.00000000 2.46326100 7.86114000  
C 0.00000000 2.45808500 5.00968600  
C 0.00000000 3.65732800 5.74934400  
C 0.00000000 3.65721100 2.82743800  
C 0.00000000 2.45677200 3.56899600  
C 0.00000000 2.45611700 0.71975900  
C 0.00000000 3.65736000 1.46081300



C 0.00000000 3.65736000 -1.46081300  
C 0.00000000 2.45611700 -0.71975900  
C 0.00000000 2.45677200 -3.56899600  
C 0.00000000 3.65721100 -2.82743800  
C 0.00000000 3.65732800 -5.74934400  
C 0.00000000 2.45808500 -5.00968600  
C 0.00000000 2.46326100 -7.86114000  
C 0.00000000 3.65719300 -7.11969000  
C 0.00000000 3.65629800 -10.05762100  
C 0.00000000 2.47081600 -9.31146000  
C 0.00000000 2.45005000 -12.14130200  
C 0.00000000 3.64294200 -11.45432700  
C 0.00000000 1.22142300 11.43933800  
C 0.00000000 0.00000000 12.11944000  
C 0.00000000 0.00000000 9.29026500  
C 0.00000000 1.22967600 10.00430500  
C 0.00000000 1.23386300 7.15238800  
C 0.00000000 0.00000000 7.86385200  
C 0.00000000 0.00000000 5.00019300  
C 0.00000000 1.23316600 5.71918100  
C 0.00000000 1.23224100 2.86124800  
C 0.00000000 0.00000000 3.58159100  
C 0.00000000 0.00000000 0.70830700  
C 0.00000000 1.23233900 1.42867100  
C 0.00000000 1.23233900 -1.42867100  
C 0.00000000 0.00000000 -0.70830700  
C 0.00000000 0.00000000 -3.58159100  
C 0.00000000 1.23224100 -2.86124800  
C 0.00000000 1.23316600 -5.71918100  
C 0.00000000 0.00000000 -5.00019300  
C 0.00000000 0.00000000 -7.86385200  
C 0.00000000 1.23386300 -7.15238800  
C 0.00000000 1.22967600 -10.00430500  
C 0.00000000 0.00000000 -9.29026500  
C 0.00000000 0.00000000 -12.11944000  
C 0.00000000 1.22142300 -11.43933800  
C 0.00000000 -1.22142300 11.43933800  
C 0.00000000 -2.45005000 12.14130200  
C 0.00000000 -2.47081600 9.31146000  
C 0.00000000 -1.22967600 10.00430500  
C 0.00000000 -1.23386300 7.15238800  
C 0.00000000 -2.46326100 7.86114000  
C 0.00000000 -2.45808500 5.00968600  
C 0.00000000 -1.23316600 5.71918100  
C 0.00000000 -1.23224100 2.86124800  
C 0.00000000 -2.45677200 3.56899600

C 0.00000000 -2.45611700 0.71975900  
C 0.00000000 -1.23233900 1.42867100  
C 0.00000000 -1.23233900 -1.42867100  
C 0.00000000 -2.45611700 -0.71975900  
C 0.00000000 -2.45677200 -3.56899600  
C 0.00000000 -1.23224100 -2.86124800  
C 0.00000000 -1.23316600 -5.71918100  
C 0.00000000 -2.45808500 -5.00968600  
C 0.00000000 -2.46326100 -7.86114000  
C 0.00000000 -1.23386300 -7.15238800  
C 0.00000000 -1.22967600 -10.00430500  
C 0.00000000 -2.47081600 -9.31146000  
C 0.00000000 -2.45005000 -12.14130200  
C 0.00000000 -1.22142300 -11.43933800  
C 0.00000000 -3.64294200 11.45432700  
C 0.00000000 -3.65629800 10.05762100  
C 0.00000000 -3.65719300 7.11969000  
C 0.00000000 -3.65732800 5.74934400  
C 0.00000000 -3.65721100 2.82743800  
C 0.00000000 -3.65736000 1.46081300  
C 0.00000000 -3.65736000 -1.46081300  
C 0.00000000 -3.65721100 -2.82743800  
C 0.00000000 -3.65732800 -5.74934400  
C 0.00000000 -3.65719300 -7.11969000  
C 0.00000000 -3.65629800 -10.05762100  
C 0.00000000 -3.64294200 -11.45432700  
H 0.00000000 -4.58481300 -11.99598000  
H 0.00000000 -4.61761000 -9.55739600  
H 0.00000000 -4.61376000 -7.62920700  
H 0.00000000 -4.61386600 -5.24096000  
H 0.00000000 -4.61345800 -3.33648200  
H 0.00000000 -4.61352600 -0.95167000  
H 0.00000000 -4.61352600 0.95167000  
H 0.00000000 -4.61345800 3.33648200  
H 0.00000000 -4.61386600 5.24096000  
H 0.00000000 -4.61376000 7.62920700  
H 0.00000000 -4.61761000 9.55739600  
H 0.00000000 -4.58481300 11.99598000  
H 0.00000000 4.58481300 -11.99598000  
H 0.00000000 4.61761000 -9.55739600  
H 0.00000000 4.61376000 -7.62920700  
H 0.00000000 4.61386600 -5.24096000  
H 0.00000000 4.61345800 -3.33648200  
H 0.00000000 4.61352600 -0.95167000  
H 0.00000000 4.61352600 0.95167000  
H 0.00000000 4.61345800 3.33648200

H 0.00000000 4.61386600 5.24096000  
H 0.00000000 4.61376000 7.62920700  
H 0.00000000 4.61761000 9.55739600  
H 0.00000000 4.58481300 11.99598000  
H 0.00000000 2.43226200 -13.22810300  
H 0.00000000 0.00000000 -13.20724300  
H 0.00000000 -2.43226200 -13.22810300  
H 0.00000000 2.43226200 13.22810300  
H 0.00000000 0.00000000 13.20724300  
H 0.00000000 -2.43226200 13.22810300

---

### **3x14 AGNR**

C 0.00000000 3.64412000 28.59535400  
C 0.00000000 2.45006100 29.28262800  
C 0.00000000 2.47068600 26.45318300  
C 0.00000000 3.65798700 27.20000900  
C 0.00000000 3.65948200 24.26219500  
C 0.00000000 2.46319200 25.00417400  
C 0.00000000 2.45809200 22.15339700  
C 0.00000000 3.65968900 22.89367900  
C 0.00000000 3.65966700 19.97199500  
C 0.00000000 2.45680900 20.71407700  
C 0.00000000 2.45635300 17.86547000  
C 0.00000000 3.65999600 18.60717900  
C 0.00000000 3.66022600 15.68527700  
C 0.00000000 2.45633000 16.42748100  
C 0.00000000 2.45653300 13.57861600  
C 0.00000000 3.66043900 14.32095700  
C 0.00000000 3.66052100 11.39853300  
C 0.00000000 2.45651900 12.14085000  
C 0.00000000 2.45656800 9.29198400  
C 0.00000000 3.66058500 10.03431200  
C 0.00000000 3.66056900 7.11193200  
C 0.00000000 2.45654500 7.85426500  
C 0.00000000 2.45655900 5.00541300  
C 0.00000000 3.66059400 5.74773200  
C 0.00000000 3.66058100 2.82537400  
C 0.00000000 2.45654800 3.56770300  
C 0.00000000 2.45655300 0.71885400  
C 0.00000000 3.66058800 1.46117800  
C 0.00000000 3.66058800 -1.46117800  
C 0.00000000 2.45655300 -0.71885400  
C 0.00000000 2.45654800 -3.56770300  
C 0.00000000 3.66058100 -2.82537400  
C 0.00000000 3.66059400 -5.74773200

C 0.00000000 2.45655900 -5.00541300  
C 0.00000000 2.45654500 -7.85426500  
C 0.00000000 3.66056900 -7.11193200  
C 0.00000000 3.66058500 -10.03431200  
C 0.00000000 2.45656800 -9.29198400  
C 0.00000000 2.45651900 -12.14085000  
C 0.00000000 3.66052100 -11.39853300  
C 0.00000000 3.66043900 -14.32095700  
C 0.00000000 2.45653300 -13.57861600  
C 0.00000000 2.45633000 -16.42748100  
C 0.00000000 3.66022600 -15.68527700  
C 0.00000000 3.65999600 -18.60717900  
C 0.00000000 2.45635300 -17.86547000  
C 0.00000000 2.45680900 -20.71407700  
C 0.00000000 3.65966700 -19.97199500  
C 0.00000000 3.65968900 -22.89367900  
C 0.00000000 2.45809200 -22.15339700  
C 0.00000000 2.46319200 -25.00417400  
C 0.00000000 3.65948200 -24.26219500  
C 0.00000000 3.65798700 -27.20000900  
C 0.00000000 2.47068600 -26.45318300  
C 0.00000000 2.45006100 -29.28262800  
C 0.00000000 3.64412000 -28.59535400  
C 0.00000000 1.22211800 28.58084900  
C 0.00000000 0.00000000 29.26079400  
C 0.00000000 0.00000000 26.43135300  
C 0.00000000 1.23069900 27.14590300  
C 0.00000000 1.23514100 24.29559900  
C 0.00000000 0.00000000 25.00744800  
C 0.00000000 0.00000000 22.14318000  
C 0.00000000 1.23446800 22.86263900  
C 0.00000000 1.23358500 20.00648000  
C 0.00000000 0.00000000 20.72721300  
C 0.00000000 0.00000000 17.85341700  
C 0.00000000 1.23377400 18.57418900  
C 0.00000000 1.23395100 15.71902800  
C 0.00000000 0.00000000 16.43968000  
C 0.00000000 0.00000000 13.56634800  
C 0.00000000 1.23406600 14.28704400  
C 0.00000000 1.23411500 11.43237600  
C 0.00000000 0.00000000 12.15299900  
C 0.00000000 0.00000000 9.27976100  
C 0.00000000 1.23414300 10.00043100  
C 0.00000000 1.23413400 7.14580900  
C 0.00000000 0.00000000 7.86646200  
C 0.00000000 0.00000000 4.99320000

C 0.00000000 1.23414400 5.71386800  
C 0.00000000 1.23413700 2.85924800  
C 0.00000000 0.00000000 3.57991000  
C 0.00000000 0.00000000 0.70664400  
C 0.00000000 1.23414000 1.42730900  
C 0.00000000 1.23414000 -1.42730900  
C 0.00000000 0.00000000 -0.70664400  
C 0.00000000 0.00000000 -3.57991000  
C 0.00000000 1.23413700 -2.85924800  
C 0.00000000 1.23414400 -5.71386800  
C 0.00000000 0.00000000 -4.99320000  
C 0.00000000 0.00000000 -7.86646200  
C 0.00000000 1.23413400 -7.14580900  
C 0.00000000 1.23414300 -10.00043100  
C 0.00000000 0.00000000 -9.27976100  
C 0.00000000 0.00000000 -12.15299900  
C 0.00000000 1.23411500 -11.43237600  
C 0.00000000 1.23406600 -14.28704400  
C 0.00000000 0.00000000 -13.56634800  
C 0.00000000 0.00000000 -16.43968000  
C 0.00000000 1.23395100 -15.71902800  
C 0.00000000 1.23377400 -18.57418900  
C 0.00000000 0.00000000 -17.85341700  
C 0.00000000 0.00000000 -20.72721300  
C 0.00000000 1.23358500 -20.00648000  
C 0.00000000 1.23446800 -22.86263900  
C 0.00000000 0.00000000 -22.14318000  
C 0.00000000 0.00000000 -25.00744800  
C 0.00000000 1.23514100 -24.29559900  
C 0.00000000 1.23069900 -27.14590300  
C 0.00000000 0.00000000 -26.43135300  
C 0.00000000 0.00000000 -29.26079400  
C 0.00000000 1.22211800 -28.58084900  
C 0.00000000 -1.22211800 28.58084900  
C 0.00000000 -2.45006100 29.28262800  
C 0.00000000 -2.47068600 26.45318300  
C 0.00000000 -1.23069900 27.14590300  
C 0.00000000 -1.23514100 24.29559900  
C 0.00000000 -2.46319200 25.00417400  
C 0.00000000 -2.45809200 22.15339700  
C 0.00000000 -1.23446800 22.86263900  
C 0.00000000 -1.23358500 20.00648000  
C 0.00000000 -2.45680900 20.71407700  
C 0.00000000 -2.45635300 17.86547000  
C 0.00000000 -1.23377400 18.57418900  
C 0.00000000 -1.23395100 15.71902800

C 0.00000000 -2.45633000 16.42748100  
C 0.00000000 -2.45653300 13.57861600  
C 0.00000000 -1.23406600 14.28704400  
C 0.00000000 -1.23411500 11.43237600  
C 0.00000000 -2.45651900 12.14085000  
C 0.00000000 -2.45656800 9.29198400  
C 0.00000000 -1.23414300 10.00043100  
C 0.00000000 -1.23413400 7.14580900  
C 0.00000000 -2.45654500 7.85426500  
C 0.00000000 -2.45655900 5.00541300  
C 0.00000000 -1.23414400 5.71386800  
C 0.00000000 -1.23413700 2.85924800  
C 0.00000000 -2.45654800 3.56770300  
C 0.00000000 -2.45655300 0.71885400  
C 0.00000000 -1.23414000 1.42730900  
C 0.00000000 -1.23414000 -1.42730900  
C 0.00000000 -2.45655300 -0.71885400  
C 0.00000000 -2.45654800 -3.56770300  
C 0.00000000 -1.23413700 -2.85924800  
C 0.00000000 -1.23414400 -5.71386800  
C 0.00000000 -2.45655900 -5.00541300  
C 0.00000000 -2.45654500 -7.85426500  
C 0.00000000 -1.23413400 -7.14580900  
C 0.00000000 -1.23414300 -10.00043100  
C 0.00000000 -2.45656800 -9.29198400  
C 0.00000000 -2.45651900 -12.14085000  
C 0.00000000 -1.23411500 -11.43237600  
C 0.00000000 -1.23406600 -14.28704400  
C 0.00000000 -2.45653300 -13.57861600  
C 0.00000000 -2.45633000 -16.42748100  
C 0.00000000 -1.23395100 -15.71902800  
C 0.00000000 -1.23377400 -18.57418900  
C 0.00000000 -2.45635300 -17.86547000  
C 0.00000000 -2.45680900 -20.71407700  
C 0.00000000 -1.23358500 -20.00648000  
C 0.00000000 -1.23446800 -22.86263900  
C 0.00000000 -2.45809200 -22.15339700  
C 0.00000000 -2.46319200 -25.00417400  
C 0.00000000 -1.23514100 -24.29559900  
C 0.00000000 -1.23069900 -27.14590300  
C 0.00000000 -2.47068600 -26.45318300  
C 0.00000000 -2.45006100 -29.28262800  
C 0.00000000 -1.22211800 -28.58084900  
C 0.00000000 -3.64412000 28.59535400  
C 0.00000000 -3.65798700 27.20000900  
C 0.00000000 -3.65948200 24.26219500

C 0.00000000 -3.65968900 22.89367900  
C 0.00000000 -3.65966700 19.97199500  
C 0.00000000 -3.65999600 18.60717900  
C 0.00000000 -3.66022600 15.68527700  
C 0.00000000 -3.66043900 14.32095700  
C 0.00000000 -3.66052100 11.39853300  
C 0.00000000 -3.66058500 10.03431200  
C 0.00000000 -3.66056900 7.11193200  
C 0.00000000 -3.66059400 5.74773200  
C 0.00000000 -3.66058100 2.82537400  
C 0.00000000 -3.66058800 1.46117800  
C 0.00000000 -3.66058800 -1.46117800  
C 0.00000000 -3.66058100 -2.82537400  
C 0.00000000 -3.66059400 -5.74773200  
C 0.00000000 -3.66056900 -7.11193200  
C 0.00000000 -3.66058500 -10.03431200  
C 0.00000000 -3.66052100 -11.39853300  
C 0.00000000 -3.66043900 -14.32095700  
C 0.00000000 -3.66022600 -15.68527700  
C 0.00000000 -3.65999600 -18.60717900  
C 0.00000000 -3.65966700 -19.97199500  
C 0.00000000 -3.65968900 -22.89367900  
C 0.00000000 -3.65948200 -24.26219500  
C 0.00000000 -3.65798700 -27.20000900  
C 0.00000000 -3.64412000 -28.59535400  
H 0.00000000 -4.58557100 29.13776400  
H 0.00000000 -4.61906100 26.69950500  
H 0.00000000 -4.61557100 24.77247300  
H 0.00000000 -4.61580200 22.38464000  
H 0.00000000 -4.61540700 20.48184600  
H 0.00000000 -4.61575800 18.09742400  
H 0.00000000 -4.61584700 16.19531800  
H 0.00000000 -4.61617400 13.81113400  
H 0.00000000 -4.61615100 11.90855100  
H 0.00000000 -4.61625900 9.52438000  
H 0.00000000 -4.61621100 7.62192300  
H 0.00000000 -4.61625300 5.23777500  
H 0.00000000 -4.61622900 3.33535000  
H 0.00000000 -4.61624100 0.95121100  
H 0.00000000 -4.61624100 -0.95121100  
H 0.00000000 -4.61622900 -3.33535000  
H 0.00000000 -4.61625300 -5.23777500  
H 0.00000000 -4.61621100 -7.62192300  
H 0.00000000 -4.61625900 -9.52438000  
H 0.00000000 -4.61615100 -11.90855100  
H 0.00000000 -4.61617400 -13.81113400

H 0.00000000 -4.61584700 -16.19531800  
H 0.00000000 -4.61575800 -18.09742400  
H 0.00000000 -4.61540700 -20.48184600  
H 0.00000000 -4.61580200 -22.38464000  
H 0.00000000 -4.61557100 -24.77247300  
H 0.00000000 -4.61906100 -26.69950500  
H 0.00000000 -4.58557100 -29.13776400  
H 0.00000000 4.58557100 29.13776400  
H 0.00000000 4.61906100 26.69950500  
H 0.00000000 4.61557100 24.77247300  
H 0.00000000 4.61580200 22.38464000  
H 0.00000000 4.61540700 20.48184600  
H 0.00000000 4.61575800 18.09742400  
H 0.00000000 4.61584700 16.19531800  
H 0.00000000 4.61617400 13.81113400  
H 0.00000000 4.61615100 11.90855100  
H 0.00000000 4.61625900 9.52438000  
H 0.00000000 4.61621100 7.62192300  
H 0.00000000 4.61625300 5.23777500  
H 0.00000000 4.61622900 3.33535000  
H 0.00000000 4.61624100 0.95121100  
H 0.00000000 4.61624100 -0.95121100  
H 0.00000000 4.61622900 -3.33535000  
H 0.00000000 4.61625300 -5.23777500  
H 0.00000000 4.61621100 -7.62192300  
H 0.00000000 4.61625900 -9.52438000  
H 0.00000000 4.61615100 -11.90855100  
H 0.00000000 4.61617400 -13.81113400  
H 0.00000000 4.61584700 -16.19531800  
H 0.00000000 4.61575800 -18.09742400  
H 0.00000000 4.61540700 -20.48184600  
H 0.00000000 4.61580200 -22.38464000  
H 0.00000000 4.61557100 -24.77247300  
H 0.00000000 4.61906100 -26.69950500  
H 0.00000000 4.58557100 -29.13776400  
H 0.00000000 2.43253100 -30.36941400  
H 0.00000000 0.00000000 -30.34859600  
H 0.00000000 -2.43253100 -30.36941400  
H 0.00000000 2.43253100 30.36941400  
H 0.00000000 0.00000000 30.34859600  
H 0.00000000 -2.43253100 30.36941400

-----



## §S5) Cartesian Coordinates of key 4x or 9-AGNRs

### 4x6 Closed Singlet

C 0.00000000 4.86668700 11.44905200  
C 0.00000000 3.67102800 12.13344400  
C 0.00000000 3.69782900 9.30617300  
C 0.00000000 4.88354200 10.05341800  
C 0.00000000 4.88613100 7.11546500  
C 0.00000000 3.69216400 7.85306600  
C 0.00000000 3.68729400 5.00783900  
C 0.00000000 4.88497600 5.74376900  
C 0.00000000 4.88313200 2.82661200  
C 0.00000000 3.68534800 3.56282000  
C 0.00000000 3.68394700 0.72198500  
C 0.00000000 4.88259700 1.45718200  
C 0.00000000 4.88259700 -1.45718200  
C 0.00000000 3.68394700 -0.72198500  
C 0.00000000 3.68534800 -3.56282000  
C 0.00000000 4.88313200 -2.82661200  
C 0.00000000 4.88497600 -5.74376900  
C 0.00000000 3.68729400 -5.00783900  
C 0.00000000 3.69216400 -7.85306600  
C 0.00000000 4.88613100 -7.11546500  
C 0.00000000 4.88354200 -10.05341800  
C 0.00000000 3.69782900 -9.30617300  
C 0.00000000 3.67102800 -12.13344400  
C 0.00000000 4.86668700 -11.44905200  
C 0.00000000 2.44554800 11.42870100  
C 0.00000000 1.22050500 12.10441200  
C 0.00000000 1.22705700 9.27557000  
C 0.00000000 2.45964600 9.99451100  
C 0.00000000 2.46673000 7.14250300  
C 0.00000000 1.22554700 7.85167700  
C 0.00000000 1.22482600 4.99620100  
C 0.00000000 2.46436500 5.71501500  
C 0.00000000 2.46185600 2.85603700  
C 0.00000000 1.22378200 3.57436400  
C 0.00000000 1.22293300 0.71095000  
C 0.00000000 2.46114000 1.42929200  
C 0.00000000 2.46114000 -1.42929200  
C 0.00000000 1.22293300 -0.71095000  
C 0.00000000 1.22378200 -3.57436400  
C 0.00000000 2.46185600 -2.85603700  
C 0.00000000 2.46436500 -5.71501500  
C 0.00000000 1.22482600 -4.99620100

C 0.00000000 1.22554700 -7.85167700  
C 0.00000000 2.46673000 -7.14250300  
C 0.00000000 2.45964600 -9.99451100  
C 0.00000000 1.22705700 -9.27557000  
C 0.00000000 1.22050500 -12.10441200  
C 0.00000000 2.44554800 -11.42870100  
C 0.00000000 0.00000000 11.42033400  
C 0.00000000 -1.22050500 12.10441200  
C 0.00000000 -1.22705700 9.27557000  
C 0.00000000 0.00000000 9.97862200  
C 0.00000000 0.00000000 7.14317400  
C 0.00000000 -1.22554700 7.85167700  
C 0.00000000 -1.22482600 4.99620100  
C 0.00000000 0.00000000 5.70568200  
C 0.00000000 0.00000000 2.86239200  
C 0.00000000 -1.22378200 3.57436400  
C 0.00000000 -1.22293300 0.71095000  
C 0.00000000 0.00000000 1.42372400  
C 0.00000000 0.00000000 -1.42372400  
C 0.00000000 -1.22293300 -0.71095000  
C 0.00000000 -1.22378200 -3.57436400  
C 0.00000000 0.00000000 -2.86239200  
C 0.00000000 0.00000000 -5.70568200  
C 0.00000000 -1.22482600 -4.99620100  
C 0.00000000 -1.22554700 -7.85167700  
C 0.00000000 0.00000000 -7.14317400  
C 0.00000000 0.00000000 -9.97862200  
C 0.00000000 -1.22705700 -9.27557000  
C 0.00000000 -1.22050500 -12.10441200  
C 0.00000000 0.00000000 -11.42033400  
C 0.00000000 -2.44554800 11.42870100  
C 0.00000000 -3.67102800 12.13344400  
C 0.00000000 -3.69782900 9.30617300  
C 0.00000000 -2.45964600 9.99451100  
C 0.00000000 -2.46673000 7.14250300  
C 0.00000000 -3.69216400 7.85306600  
C 0.00000000 -3.68729400 5.00783900  
C 0.00000000 -2.46436500 5.71501500  
C 0.00000000 -2.46185600 2.85603700  
C 0.00000000 -3.68534800 3.56282000  
C 0.00000000 -3.68394700 0.72198500  
C 0.00000000 -2.46114000 1.42929200  
C 0.00000000 -2.46114000 -1.42929200  
C 0.00000000 -3.68394700 -0.72198500  
C 0.00000000 -3.68534800 -3.56282000  
C 0.00000000 -2.46185600 -2.85603700

C 0.00000000 -2.46436500 -5.71501500  
C 0.00000000 -3.68729400 -5.00783900  
C 0.00000000 -3.69216400 -7.85306600  
C 0.00000000 -2.46673000 -7.14250300  
C 0.00000000 -2.45964600 -9.99451100  
C 0.00000000 -3.69782900 -9.30617300  
C 0.00000000 -3.67102800 -12.13344400  
C 0.00000000 -2.44554800 -11.42870100  
C 0.00000000 -4.86668700 11.44905200  
C 0.00000000 -4.88354200 10.05341800  
C 0.00000000 -4.88613100 7.11546500  
C 0.00000000 -4.88497600 5.74376900  
C 0.00000000 -4.88313200 2.82661200  
C 0.00000000 -4.88259700 1.45718200  
C 0.00000000 -4.88259700 -1.45718200  
C 0.00000000 -4.88313200 -2.82661200  
C 0.00000000 -4.88497600 -5.74376900  
C 0.00000000 -4.88613100 -7.11546500  
C 0.00000000 -4.88354200 -10.05341800  
C 0.00000000 -4.86668700 -11.44905200  
H 0.00000000 -5.80684400 -11.99365200  
H 0.00000000 -5.84546700 -9.55449100  
H 0.00000000 -5.84252600 -7.62513500  
H 0.00000000 -5.84123000 -5.23490800  
H 0.00000000 -5.83945900 -3.33529800  
H 0.00000000 -5.83859400 -0.94795700  
H 0.00000000 -5.83859400 0.94795700  
H 0.00000000 -5.83945900 3.33529800  
H 0.00000000 -5.84123000 5.23490800  
H 0.00000000 -5.84252600 7.62513500  
H 0.00000000 -5.84546700 9.55449100  
H 0.00000000 -5.80684400 11.99365200  
H 0.00000000 5.80684400 -11.99365200  
H 0.00000000 5.84546700 -9.55449100  
H 0.00000000 5.84252600 -7.62513500  
H 0.00000000 5.84123000 -5.23490800  
H 0.00000000 5.83945900 -3.33529800  
H 0.00000000 5.83859400 -0.94795700  
H 0.00000000 5.83859400 0.94795700  
H 0.00000000 5.83945900 3.33529800  
H 0.00000000 5.84123000 5.23490800  
H 0.00000000 5.84252600 7.62513500  
H 0.00000000 5.84546700 9.55449100  
H 0.00000000 5.80684400 11.99365200  
H 0.00000000 3.65110800 -13.22017300  
H 0.00000000 1.21582000 -13.19209000

H 0.00000000 -1.21582000 -13.19209000  
H 0.00000000 -3.65110800 -13.22017300  
H 0.00000000 3.65110800 13.22017300  
H 0.00000000 1.21582000 13.19209000  
H 0.00000000 -1.21582000 13.19209000  
H 0.00000000 -3.65110800 13.22017300

---

#### **4x6 Open Singlet**

C 0.00000000 4.87259500 11.44252000  
C 0.00000000 3.67230800 12.12761800  
C 0.00000000 3.69911400 9.30331200  
C 0.00000000 4.88858000 10.05080300  
C 0.00000000 4.88811200 7.11363300  
C 0.00000000 3.69312900 7.85153500  
C 0.00000000 3.68780900 5.00718900  
C 0.00000000 4.88633100 5.74259200  
C 0.00000000 4.88364600 2.82630400  
C 0.00000000 3.68563200 3.56245400  
C 0.00000000 3.68415200 0.72194400  
C 0.00000000 4.88305200 1.45699700  
C 0.00000000 4.88305200 -1.45699700  
C 0.00000000 3.68415200 -0.72194400  
C 0.00000000 3.68563200 -3.56245400  
C 0.00000000 4.88364600 -2.82630400  
C 0.00000000 4.88633100 -5.74259200  
C 0.00000000 3.68780900 -5.00718900  
C 0.00000000 3.69312900 -7.85153500  
C 0.00000000 4.88811200 -7.11363300  
C 0.00000000 4.88858000 -10.05080300  
C 0.00000000 3.69911400 -9.30331200  
C 0.00000000 3.67230800 -12.12761800  
C 0.00000000 4.87259500 -11.44252000  
C 0.00000000 2.45193700 11.42362300  
C 0.00000000 1.22013900 12.10267900  
C 0.00000000 1.22685800 9.27299400  
C 0.00000000 2.46367400 9.99281400  
C 0.00000000 2.46823500 7.14164000  
C 0.00000000 1.22567400 7.85206800  
C 0.00000000 1.22493100 4.99596300  
C 0.00000000 2.46518900 5.71472300  
C 0.00000000 2.46214100 2.85587200  
C 0.00000000 1.22384600 3.57447400  
C 0.00000000 1.22295800 0.71088100  
C 0.00000000 2.46137600 1.42926500  
C 0.00000000 2.46137600 -1.42926500  
C 0.00000000 1.22295800 -0.71088100

C 0.00000000 1.22384600 -3.57447400  
C 0.00000000 2.46214100 -2.85587200  
C 0.00000000 2.46518900 -5.71472300  
C 0.00000000 1.22493100 -4.99596300  
C 0.00000000 1.22567400 -7.85206800  
C 0.00000000 2.46823500 -7.14164000  
C 0.00000000 2.46367400 -9.99281400  
C 0.00000000 1.22685800 -9.27299400  
C 0.00000000 1.22013900 -12.10267900  
C 0.00000000 2.45193700 -11.42362300  
C 0.00000000 0.00000000 11.41774600  
C 0.00000000 -1.22013900 12.10267900  
C 0.00000000 -1.22685800 9.27299400  
C 0.00000000 0.00000000 9.97610200  
C 0.00000000 0.00000000 7.14290100  
C 0.00000000 -1.22567400 7.85206800  
C 0.00000000 -1.22493100 4.99596300  
C 0.00000000 0.00000000 5.70558700  
C 0.00000000 0.00000000 2.86240700  
C 0.00000000 -1.22384600 3.57447400  
C 0.00000000 -1.22295800 0.71088100  
C 0.00000000 0.00000000 1.42374400  
C 0.00000000 0.00000000 -1.42374400  
C 0.00000000 -1.22295800 -0.71088100  
C 0.00000000 -1.22384600 -3.57447400  
C 0.00000000 0.00000000 -2.86240700  
C 0.00000000 0.00000000 -5.70558700  
C 0.00000000 -1.22493100 -4.99596300  
C 0.00000000 -1.22567400 -7.85206800  
C 0.00000000 0.00000000 -7.14290100  
C 0.00000000 0.00000000 -9.97610200  
C 0.00000000 -1.22685800 -9.27299400  
C 0.00000000 -1.22013900 -12.10267900  
C 0.00000000 0.00000000 -11.41774600  
C 0.00000000 -2.45193700 11.42362300  
C 0.00000000 -3.67230800 12.12761800  
C 0.00000000 -3.69911400 9.30331200  
C 0.00000000 -2.46367400 9.99281400  
C 0.00000000 -2.46823500 7.14164000  
C 0.00000000 -3.69312900 7.85153500  
C 0.00000000 -3.68780900 5.00718900  
C 0.00000000 -2.46518900 5.71472300  
C 0.00000000 -2.46214100 2.85587200  
C 0.00000000 -3.68563200 3.56245400  
C 0.00000000 -3.68415200 0.72194400  
C 0.00000000 -2.46137600 1.42926500

C 0.00000000 -2.46137600 -1.42926500  
C 0.00000000 -3.68415200 -0.72194400  
C 0.00000000 -3.68563200 -3.56245400  
C 0.00000000 -2.46214100 -2.85587200  
C 0.00000000 -2.46518900 -5.71472300  
C 0.00000000 -3.68780900 -5.00718900  
C 0.00000000 -3.69312900 -7.85153500  
C 0.00000000 -2.46823500 -7.14164000  
C 0.00000000 -2.46367400 -9.99281400  
C 0.00000000 -3.69911400 -9.30331200  
C 0.00000000 -3.67230800 -12.12761800  
C 0.00000000 -2.45193700 -11.42362300  
C 0.00000000 -4.87259500 11.44252000  
C 0.00000000 -4.88858000 10.05080300  
C 0.00000000 -4.88811200 7.11363300  
C 0.00000000 -4.88633100 5.74259200  
C 0.00000000 -4.88364600 2.82630400  
C 0.00000000 -4.88305200 1.45699700  
C 0.00000000 -4.88305200 -1.45699700  
C 0.00000000 -4.88364600 -2.82630400  
C 0.00000000 -4.88633100 -5.74259200  
C 0.00000000 -4.88811200 -7.11363300  
C 0.00000000 -4.88858000 -10.05080300  
C 0.00000000 -4.87259500 -11.44252000  
H 0.00000000 -5.81211100 -11.98818900  
H 0.00000000 -5.84965600 -9.55010500  
H 0.00000000 -5.84440600 -7.62341500  
H 0.00000000 -5.84218400 -5.23291200  
H 0.00000000 -5.83988000 -3.33519000  
H 0.00000000 -5.83893600 -0.94755500  
H 0.00000000 -5.83893600 0.94755500  
H 0.00000000 -5.83988000 3.33519000  
H 0.00000000 -5.84218400 5.23291200  
H 0.00000000 -5.84440600 7.62341500  
H 0.00000000 -5.84965600 9.55010500  
H 0.00000000 -5.81211100 11.98818900  
H 0.00000000 5.81211100 -11.98818900  
H 0.00000000 5.84965600 -9.55010500  
H 0.00000000 5.84440600 -7.62341500  
H 0.00000000 5.84218400 -5.23291200  
H 0.00000000 5.83988000 -3.33519000  
H 0.00000000 5.83893600 -0.94755500  
H 0.00000000 5.83893600 0.94755500  
H 0.00000000 5.83988000 3.33519000  
H 0.00000000 5.84218400 5.23291200  
H 0.00000000 5.84440600 7.62341500

H 0.00000000 5.84965600 9.55010500  
H 0.00000000 5.81211100 11.98818900  
H 0.00000000 3.65255600 -13.21441000  
H 0.00000000 1.21621600 -13.19023900  
H 0.00000000 -1.21621600 -13.19023900  
H 0.00000000 -3.65255600 -13.21441000  
H 0.00000000 3.65255600 13.21441000  
H 0.00000000 1.21621600 13.19023900  
H 0.00000000 -1.21621600 13.19023900  
H 0.00000000 -3.65255600 13.21441000

-----  
**4x6 Triplet**

C 0.00000000 4.87259500 11.44252000  
C 0.00000000 3.67230800 12.12761800  
C 0.00000000 3.69911400 9.30331200  
C 0.00000000 4.88858000 10.05080300  
C 0.00000000 4.88811200 7.11363300  
C 0.00000000 3.69312900 7.85153500  
C 0.00000000 3.68780900 5.00718900  
C 0.00000000 4.88633100 5.74259200  
C 0.00000000 4.88364600 2.82630400  
C 0.00000000 3.68563200 3.56245400  
C 0.00000000 3.68415200 0.72194400  
C 0.00000000 4.88305200 1.45699700  
C 0.00000000 4.88305200 -1.45699700  
C 0.00000000 3.68415200 -0.72194400  
C 0.00000000 3.68563200 -3.56245400  
C 0.00000000 4.88364600 -2.82630400  
C 0.00000000 4.88633100 -5.74259200  
C 0.00000000 3.68780900 -5.00718900  
C 0.00000000 3.69312900 -7.85153500  
C 0.00000000 4.88811200 -7.11363300  
C 0.00000000 4.88858000 -10.05080300  
C 0.00000000 3.69911400 -9.30331200  
C 0.00000000 3.67230800 -12.12761800  
C 0.00000000 4.87259500 -11.44252000  
C 0.00000000 2.45193700 11.42362300  
C 0.00000000 1.22013900 12.10267900  
C 0.00000000 1.22685800 9.27299400  
C 0.00000000 2.46367400 9.99281400  
C 0.00000000 2.46823500 7.14164000  
C 0.00000000 1.22567400 7.85206800  
C 0.00000000 1.22493100 4.99596300  
C 0.00000000 2.46518900 5.71472300  
C 0.00000000 2.46214100 2.85587200  
C 0.00000000 1.22384600 3.57447400

C 0.00000000 1.22295800 0.71088100  
C 0.00000000 2.46137600 1.42926500  
C 0.00000000 2.46137600 -1.42926500  
C 0.00000000 1.22295800 -0.71088100  
C 0.00000000 1.22384600 -3.57447400  
C 0.00000000 2.46214100 -2.85587200  
C 0.00000000 2.46518900 -5.71472300  
C 0.00000000 1.22493100 -4.99596300  
C 0.00000000 1.22567400 -7.85206800  
C 0.00000000 2.46823500 -7.14164000  
C 0.00000000 2.46367400 -9.99281400  
C 0.00000000 1.22685800 -9.27299400  
C 0.00000000 1.22013900 -12.10267900  
C 0.00000000 2.45193700 -11.42362300  
C 0.00000000 0.00000000 11.41774600  
C 0.00000000 -1.22013900 12.10267900  
C 0.00000000 -1.22685800 9.27299400  
C 0.00000000 0.00000000 9.97610200  
C 0.00000000 0.00000000 7.14290100  
C 0.00000000 -1.22567400 7.85206800  
C 0.00000000 -1.22493100 4.99596300  
C 0.00000000 0.00000000 5.70558700  
C 0.00000000 0.00000000 2.86240700  
C 0.00000000 -1.22384600 3.57447400  
C 0.00000000 -1.22295800 0.71088100  
C 0.00000000 0.00000000 1.42374400  
C 0.00000000 0.00000000 -1.42374400  
C 0.00000000 -1.22295800 -0.71088100  
C 0.00000000 -1.22384600 -3.57447400  
C 0.00000000 0.00000000 -2.86240700  
C 0.00000000 0.00000000 -5.70558700  
C 0.00000000 -1.22493100 -4.99596300  
C 0.00000000 -1.22567400 -7.85206800  
C 0.00000000 0.00000000 -7.14290100  
C 0.00000000 0.00000000 -9.97610200  
C 0.00000000 -1.22685800 -9.27299400  
C 0.00000000 -1.22013900 -12.10267900  
C 0.00000000 0.00000000 -11.41774600  
C 0.00000000 -2.45193700 11.42362300  
C 0.00000000 -3.67230800 12.12761800  
C 0.00000000 -3.69911400 9.30331200  
C 0.00000000 -2.46367400 9.99281400  
C 0.00000000 -2.46823500 7.14164000  
C 0.00000000 -3.69312900 7.85153500  
C 0.00000000 -3.68780900 5.00718900  
C 0.00000000 -2.46518900 5.71472300



C 0.00000000 -2.46214100 2.85587200  
C 0.00000000 -3.68563200 3.56245400  
C 0.00000000 -3.68415200 0.72194400  
C 0.00000000 -2.46137600 1.42926500  
C 0.00000000 -2.46137600 -1.42926500  
C 0.00000000 -3.68415200 -0.72194400  
C 0.00000000 -3.68563200 -3.56245400  
C 0.00000000 -2.46214100 -2.85587200  
C 0.00000000 -2.46518900 -5.71472300  
C 0.00000000 -3.68780900 -5.00718900  
C 0.00000000 -3.69312900 -7.85153500  
C 0.00000000 -2.46823500 -7.14164000  
C 0.00000000 -2.46367400 -9.99281400  
C 0.00000000 -3.69911400 -9.30331200  
C 0.00000000 -3.67230800 -12.12761800  
C 0.00000000 -2.45193700 -11.42362300  
C 0.00000000 -4.87259500 11.44252000  
C 0.00000000 -4.88858000 10.05080300  
C 0.00000000 -4.88811200 7.11363300  
C 0.00000000 -4.88633100 5.74259200  
C 0.00000000 -4.88364600 2.82630400  
C 0.00000000 -4.88305200 1.45699700  
C 0.00000000 -4.88305200 -1.45699700  
C 0.00000000 -4.88364600 -2.82630400  
C 0.00000000 -4.88633100 -5.74259200  
C 0.00000000 -4.88811200 -7.11363300  
C 0.00000000 -4.88858000 -10.05080300  
C 0.00000000 -4.87259500 -11.44252000  
H 0.00000000 -5.81211100 -11.98818900  
H 0.00000000 -5.84965600 -9.55010500  
H 0.00000000 -5.84440600 -7.62341500  
H 0.00000000 -5.84218400 -5.23291200  
H 0.00000000 -5.83988000 -3.33519000  
H 0.00000000 -5.83893600 -0.94755500  
H 0.00000000 -5.83893600 0.94755500  
H 0.00000000 -5.83988000 3.33519000  
H 0.00000000 -5.84218400 5.23291200  
H 0.00000000 -5.84440600 7.62341500  
H 0.00000000 -5.84965600 9.55010500  
H 0.00000000 -5.81211100 11.98818900  
H 0.00000000 5.81211100 -11.98818900  
H 0.00000000 5.84965600 -9.55010500  
H 0.00000000 5.84440600 -7.62341500  
H 0.00000000 5.84218400 -5.23291200  
H 0.00000000 5.83988000 -3.33519000  
H 0.00000000 5.83893600 -0.94755500

H 0.00000000 5.83893600 0.94755500  
H 0.00000000 5.83988000 3.33519000  
H 0.00000000 5.84218400 5.23291200  
H 0.00000000 5.84440600 7.62341500  
H 0.00000000 5.84965600 9.55010500  
H 0.00000000 5.81211100 11.98818900  
H 0.00000000 3.65255600 -13.21441000  
H 0.00000000 1.21621600 -13.19023900  
H 0.00000000 -1.21621600 -13.19023900  
H 0.00000000 -3.65255600 -13.21441000  
H 0.00000000 3.65255600 13.21441000  
H 0.00000000 1.21621600 13.19023900  
H 0.00000000 -1.21621600 13.19023900  
H 0.00000000 -3.65255600 13.21441000

-----  
**Partially Edge-modified 4x6 closed singlet**

C 0.00000000 3.64427900 9.28123600  
C 0.00000000 4.88304400 7.13684600  
C 0.00000000 3.67340800 7.85344700  
C 0.00000000 3.69503200 5.01339000  
C 0.00000000 4.89148200 5.76342600  
C 0.00000000 4.88882400 2.82895900  
C 0.00000000 3.69185900 3.56733300  
C 0.00000000 3.68885700 0.72215900  
C 0.00000000 4.88741400 1.45917600  
C 0.00000000 4.88741400 -1.45917600  
C 0.00000000 3.68885700 -0.72215900  
C 0.00000000 3.69185900 -3.56733300  
C 0.00000000 4.88882400 -2.82895900  
C 0.00000000 4.89148200 -5.76342600  
C 0.00000000 3.69503200 -5.01339000  
C 0.00000000 3.67340800 -7.85344700  
C 0.00000000 4.88304400 -7.13684600  
C 0.00000000 3.64427900 -9.28123600  
C 0.00000000 1.21732200 9.26485700  
C 0.00000000 2.46688600 9.95975300  
C 0.00000000 2.45506500 7.13037600  
C 0.00000000 1.22101300 7.83764600  
C 0.00000000 1.22618200 4.98661000  
C 0.00000000 2.46376200 5.70644400  
C 0.00000000 2.46718200 2.85613200  
C 0.00000000 1.22552000 3.56724100  
C 0.00000000 1.22577400 0.71058300  
C 0.00000000 2.46563600 1.42924700  
C 0.00000000 2.46563600 -1.42924700

C 0.00000000 1.22577400 -0.71058300  
C 0.00000000 1.22552000 -3.56724100  
C 0.00000000 2.46718200 -2.85613200  
C 0.00000000 2.46376200 -5.70644400  
C 0.00000000 1.22618200 -4.98661000  
C 0.00000000 1.22101300 -7.83764600  
C 0.00000000 2.45506500 -7.13037600  
C 0.00000000 2.46688600 -9.95975300  
C 0.00000000 1.21732200 -9.26485700  
C 0.00000000 -1.21732200 9.26485700  
C 0.00000000 0.00000000 9.94545400  
C 0.00000000 0.00000000 7.12733600  
C 0.00000000 -1.22101300 7.83764600  
C 0.00000000 -1.22618200 4.98661000  
C 0.00000000 0.00000000 5.69398400  
C 0.00000000 0.00000000 2.85677000  
C 0.00000000 -1.22552000 3.56724100  
C 0.00000000 -1.22577400 0.71058300  
C 0.00000000 0.00000000 1.42024800  
C 0.00000000 0.00000000 -1.42024800  
C 0.00000000 -1.22577400 -0.71058300  
C 0.00000000 -1.22552000 -3.56724100  
C 0.00000000 0.00000000 -2.85677000  
C 0.00000000 0.00000000 -5.69398400  
C 0.00000000 -1.22618200 -4.98661000  
C 0.00000000 -1.22101300 -7.83764600  
C 0.00000000 0.00000000 -7.12733600  
C 0.00000000 0.00000000 -9.94545400  
C 0.00000000 -1.21732200 -9.26485700  
C 0.00000000 -3.64427900 9.28123600  
C 0.00000000 -2.46688600 9.95975300  
C 0.00000000 -2.45506500 7.13037600  
C 0.00000000 -3.67340800 7.85344700  
C 0.00000000 -3.69503200 5.01339000  
C 0.00000000 -2.46376200 5.70644400  
C 0.00000000 -2.46718200 2.85613200  
C 0.00000000 -3.69185900 3.56733300  
C 0.00000000 -3.68885700 0.72215900  
C 0.00000000 -2.46563600 1.42924700  
C 0.00000000 -2.46563600 -1.42924700  
C 0.00000000 -3.68885700 -0.72215900  
C 0.00000000 -3.69185900 -3.56733300  
C 0.00000000 -2.46718200 -2.85613200  
C 0.00000000 -2.46376200 -5.70644400  
C 0.00000000 -3.69503200 -5.01339000  
C 0.00000000 -3.67340800 -7.85344700

C 0.00000000 -2.45506500 -7.13037600  
 C 0.00000000 -2.46688600 -9.95975300  
 C 0.00000000 -3.64427900 -9.28123600  
 C 0.00000000 -4.88304400 7.13684600  
 C 0.00000000 -4.89148200 5.76342600  
 C 0.00000000 -4.88882400 2.82895900  
 C 0.00000000 -4.88741400 1.45917600  
 C 0.00000000 -4.88741400 -1.45917600  
 C 0.00000000 -4.88882400 -2.82895900  
 C 0.00000000 -4.89148200 -5.76342600  
 C 0.00000000 -4.88304400 -7.13684600  
 H 0.00000000 -5.82171200 -7.68567500  
 H 0.00000000 -5.84989900 -5.25762900  
 H 0.00000000 -5.84500700 -3.33863100  
 H 0.00000000 -5.84335300 -0.94965500  
 H 0.00000000 -5.84335300 0.94965500  
 H 0.00000000 -5.84500700 3.33863100  
 H 0.00000000 -5.84989900 5.25762900  
 H 0.00000000 -5.82171200 7.68567500  
 H 0.00000000 5.82171200 -7.68567500  
 H 0.00000000 5.84989900 -5.25762900  
 H 0.00000000 5.84500700 -3.33863100  
 H 0.00000000 5.84335300 -0.94965500  
 H 0.00000000 5.84335300 0.94965500  
 H 0.00000000 5.84500700 3.33863100  
 H 0.00000000 5.84989900 5.25762900  
 H 0.00000000 5.82171200 7.68567500  
 H 0.00000000 4.59064200 -9.81672600  
 H 0.00000000 2.45381500 -11.04690300  
 H 0.00000000 0.00000000 -11.03359000  
 H 0.00000000 -2.45381500 -11.04690300  
 H 0.00000000 -4.59064200 -9.81672600  
 H 0.00000000 4.59064200 9.81672600  
 H 0.00000000 2.45381500 11.04690300  
 H 0.00000000 0.00000000 11.03359000  
 H 0.00000000 -2.45381500 11.04690300  
 H 0.00000000 -4.59064200 9.81672600

-----  
**Edge-modified 4x6 closed singlet**

C 0.00000000 3.64427900 9.28123600  
 C 0.00000000 4.88304400 7.13684600  
 C 0.00000000 3.67340800 7.85344700  
 C 0.00000000 3.69503200 5.01339000  
 C 0.00000000 4.89148200 5.76342600  
 C 0.00000000 4.88882400 2.82895900  
 C 0.00000000 3.69185900 3.56733300

C 0.00000000 3.68885700 0.72215900  
C 0.00000000 4.88741400 1.45917600  
C 0.00000000 4.88741400 -1.45917600  
C 0.00000000 3.68885700 -0.72215900  
C 0.00000000 3.69185900 -3.56733300  
C 0.00000000 4.88882400 -2.82895900  
C 0.00000000 4.89148200 -5.76342600  
C 0.00000000 3.69503200 -5.01339000  
C 0.00000000 3.67340800 -7.85344700  
C 0.00000000 4.88304400 -7.13684600  
C 0.00000000 3.64427900 -9.28123600  
C 0.00000000 1.21732200 9.26485700  
C 0.00000000 2.46688600 9.95975300  
C 0.00000000 2.45506500 7.13037600  
C 0.00000000 1.22101300 7.83764600  
C 0.00000000 1.22618200 4.98661000  
C 0.00000000 2.46376200 5.70644400  
C 0.00000000 2.46718200 2.85613200  
C 0.00000000 1.22552000 3.56724100  
C 0.00000000 1.22577400 0.71058300  
C 0.00000000 2.46563600 1.42924700  
C 0.00000000 2.46563600 -1.42924700  
C 0.00000000 1.22577400 -0.71058300  
C 0.00000000 1.22552000 -3.56724100  
C 0.00000000 2.46718200 -2.85613200  
C 0.00000000 2.46376200 -5.70644400  
C 0.00000000 1.22618200 -4.98661000  
C 0.00000000 1.22101300 -7.83764600  
C 0.00000000 2.45506500 -7.13037600  
C 0.00000000 2.46688600 -9.95975300  
C 0.00000000 1.21732200 -9.26485700  
C 0.00000000 -1.21732200 9.26485700  
C 0.00000000 0.00000000 9.94545400  
C 0.00000000 0.00000000 7.12733600  
C 0.00000000 -1.22101300 7.83764600  
C 0.00000000 -1.22618200 4.98661000  
C 0.00000000 0.00000000 5.69398400  
C 0.00000000 0.00000000 2.85677000  
C 0.00000000 -1.22552000 3.56724100  
C 0.00000000 -1.22577400 0.71058300  
C 0.00000000 0.00000000 1.42024800  
C 0.00000000 0.00000000 -1.42024800  
C 0.00000000 -1.22577400 -0.71058300  
C 0.00000000 -1.22552000 -3.56724100  
C 0.00000000 0.00000000 -2.85677000  
C 0.00000000 0.00000000 -5.69398400

C 0.00000000 -1.22618200 -4.98661000  
C 0.00000000 -1.22101300 -7.83764600  
C 0.00000000 0.00000000 -7.12733600  
C 0.00000000 0.00000000 -9.94545400  
C 0.00000000 -1.21732200 -9.26485700  
C 0.00000000 -3.64427900 9.28123600  
C 0.00000000 -2.46688600 9.95975300  
C 0.00000000 -2.45506500 7.13037600  
C 0.00000000 -3.67340800 7.85344700  
C 0.00000000 -3.69503200 5.01339000  
C 0.00000000 -2.46376200 5.70644400  
C 0.00000000 -2.46718200 2.85613200  
C 0.00000000 -3.69185900 3.56733300  
C 0.00000000 -3.68885700 0.72215900  
C 0.00000000 -2.46563600 1.42924700  
C 0.00000000 -2.46563600 -1.42924700  
C 0.00000000 -3.68885700 -0.72215900  
C 0.00000000 -3.69185900 -3.56733300  
C 0.00000000 -2.46718200 -2.85613200  
C 0.00000000 -2.46376200 -5.70644400  
C 0.00000000 -3.69503200 -5.01339000  
C 0.00000000 -3.67340800 -7.85344700  
C 0.00000000 -2.45506500 -7.13037600  
C 0.00000000 -2.46688600 -9.95975300  
C 0.00000000 -3.64427900 -9.28123600  
C 0.00000000 -4.88304400 7.13684600  
C 0.00000000 -4.89148200 5.76342600  
C 0.00000000 -4.88882400 2.82895900  
C 0.00000000 -4.88741400 1.45917600  
C 0.00000000 -4.88741400 -1.45917600  
C 0.00000000 -4.88882400 -2.82895900  
C 0.00000000 -4.89148200 -5.76342600  
C 0.00000000 -4.88304400 -7.13684600  
H 0.00000000 -5.82171200 -7.68567500  
H 0.00000000 -5.84989900 -5.25762900  
H 0.00000000 -5.84500700 -3.33863100  
H 0.00000000 -5.84335300 -0.94965500  
H 0.00000000 -5.84335300 0.94965500  
H 0.00000000 -5.84500700 3.33863100  
H 0.00000000 -5.84989900 5.25762900  
H 0.00000000 -5.82171200 7.68567500  
H 0.00000000 5.82171200 -7.68567500  
H 0.00000000 5.84989900 -5.25762900  
H 0.00000000 5.84500700 -3.33863100  
H 0.00000000 5.84335300 -0.94965500  
H 0.00000000 5.84335300 0.94965500

H 0.00000000 5.84500700 3.33863100  
H 0.00000000 5.84989900 5.25762900  
H 0.00000000 5.82171200 7.68567500  
H 0.00000000 4.59064200 -9.81672600  
H 0.00000000 2.45381500 -11.04690300  
H 0.00000000 0.00000000 -11.03359000  
H 0.00000000 -2.45381500 -11.04690300  
H 0.00000000 -4.59064200 -9.81672600  
H 0.00000000 4.59064200 9.81672600  
H 0.00000000 2.45381500 11.04690300  
H 0.00000000 0.00000000 11.03359000  
H 0.00000000 -2.45381500 11.04690300  
H 0.00000000 -4.59064200 9.81672600  
=====

## REFERENCES

1. Gaussian 09. Revision A.02. M. J. Frisch. G. W. Trucks. H. B. Schlegel. G. E. Scuseria. M. A. Robb. J. R. Cheeseman. G. Scalmani. V. Barone. G. A. Petersson. H. Nakatsuji. X. Li. M. Caricato. A. Marenich. J. Bloino. B. G. Janesko. R. Gomperts. B. Mennucci. H. P. Hratchian. J. V. Ortiz. A. F. Izmaylov. J. L. Sonnenberg. D. Williams-Young. F. Ding. F. Lipparini. F. Egidi. J. Goings. B. Peng. A. Petrone. T. Henderson. D. Ranasinghe. V. G. Zakrzewski. J. Gao. N. Rega. G. Zheng. W. Liang. M. Hada. M. Ehara. K. Toyota. R. Fukuda. J. Hasegawa. M. Ishida. T. Nakajima. Y. Honda. O. Kitao. H. Nakai. T. Vreven. K. Throssell. J. A. Montgomery, Jr.. J. E. Peralta. F. Ogliaro. M. Bearpark. J. J. Heyd. E. Brothers. K. N. Kudin. V. N. Staroverov. T. Keith. R. Kobayashi. J. Normand. K. Raghavachari. A. Rendell. J. C. Burant. S. S. Iyengar. J. Tomasi. M. Cossi. J. M. Millam. M. Klene. C. Adamo. R. Cammi. J. W. Ochterski. R. L. Martin. K. Morokuma. O. Farkas. J. B. Foresman. and D. J. Fox. Gaussian. Inc.. Wallingford CT. 2016.
2. Wang, S. et al. Giant edge state splitting at atomically precise graphene zigzag edges. *Nat. Commun.* 2016 7 : 1150. DOI: 10.1038/ncomms115077
3. Zdetsis A. D.; Economou, E. N. Topological Metal-Insulator Transition in Narrow Graphene Nanoribbons? *Carbon* **2021**, 176, 548-557
4. Zdetsis, A. D.  $4n+2=6n$ ? A Geometrical Approach to Aromaticity? *J. Phys. Chem. A* **2021**, 125, 6064-6074
5. Talirz, L.; Söde, H; Dumslaff, T. et al. On-Surface Synthesis and Characterization of 9-Atom Wide Armchair Graphene Nanoribbons. *ACS Nano*. 2017, 11, 1380-1388.
